# Supplementary material for: SWATH-MS for prospective identification of protein blood biomarkers of rtPA-associated intracranial hemorrhage in acute ischemic stroke: a pilot study
Source: PubMed Central journal article supplement (PMC8455557; doi:10.1038/s41598-021-97710-9), 2021-09-21
Supplement: 41598_2021_97710_MOESM3_ESM.pdf [file 41598_2021_97710_MOESM3_ESM.pdf]

***SWATH- MS for prospective identification of protein blood biomarkers of rtPA-associated intracranial hemorrhage in acute ischemic stroke: a pilot study***

*Bartosz Karaszewski, Anna Gójska-Grymajło, Paulina Czaplewska, Bartosz Jabłoński, Aleksandra E. Lewandowska, Daria Ossowska, Adam Wyszomirski, Marek Hałas, Edyta Szurowska*

***Supplementary Table 2a. Differences in distributions of serum proteins in patients with and without intracranial hemorrhage (ICH).***

|                                                    | Without ICH<br>(N=31)         | With ICH (N=8)                | p<br>value |
|----------------------------------------------------|-------------------------------|-------------------------------|------------|
| <b>Q96PD5 (N-acetylmuramoyl-L-alanine amidase)</b> |                               |                               | 0.005      |
| Min-Max                                            | 80530 - 231020                | 81564 - 125403                |            |
| Mean                                               | 134707                        | 105072                        |            |
| Median (Q1,Q3)                                     | 132403<br>(112506,<br>144959) | 106430 (97185,<br>112539)     |            |
| Quartile coefficient of dispersion                 | 0.13                          | 0.07                          |            |
| <b>P08697 (Alpha-2-antiplasmin)</b>                |                               |                               | 0.008      |
| Min-Max                                            | 83714 - 371646                | 81827 - 234129                |            |
| Mean                                               | 196150                        | 132496                        |            |
| Median (Q1,Q3)                                     | 187178<br>(159237,<br>248123) | 115280<br>(104682,<br>147788) |            |
| Quartile coefficient of dispersion                 | 0.22                          | 0.17                          |            |
| <b>P02768 (Serum albumin)</b>                      |                               |                               | 0.009      |
| Min-Max                                            | 15938112 -<br>70009459        | 40556735 -<br>87367623        |            |
| Mean                                               | 46707880                      | 63506160                      |            |

|                                                       |                                     |                                     |       |
|-------------------------------------------------------|-------------------------------------|-------------------------------------|-------|
| Median (Q1,Q3)                                        | 45342383<br>(39620003,<br>55110740) | 62189923<br>(57234653,<br>67960436) |       |
| Quartile coefficient of dispersion                    | 0.16                                | 0.09                                |       |
| <b>P05543 (Thyroxine-binding globulin)</b>            |                                     |                                     | 0.011 |
| Min-Max                                               | 88729 - 744012                      | 87469 - 270867                      |       |
| Mean                                                  | 246129                              | 150981                              |       |
| Median (Q1,Q3)                                        | 228327<br>(170936,<br>283297)       | 136446<br>(126292,<br>162640)       |       |
| Quartile coefficient of dispersion                    | 0.25                                | 0.13                                |       |
| <b>P02790 (Hemopexin)</b>                             |                                     |                                     | 0.015 |
| Min-Max                                               | 1529212 -<br>10034154               | 2103865 -<br>7912770                |       |
| Mean                                                  | 7057868                             | 5085098                             |       |
| Median (Q1,Q3)                                        | 7305937<br>(5506160,<br>8763109)    | 4938764<br>(3924808,<br>6221529)    |       |
| Quartile coefficient of dispersion                    | 0.23                                | 0.23                                |       |
| <b>P01861 (Immunoglobulin heavy constant gamma 4)</b> |                                     |                                     | 0.024 |
| Min-Max                                               | 18771 - 894352                      | 113538 -<br>840738                  |       |
| Mean                                                  | 233105                              | 472844                              |       |
| Median (Q1,Q3)                                        | 134459 (69795,<br>346066)           | 486461<br>(272433,<br>685669)       |       |
| Quartile coefficient of dispersion                    | 0.66                                | 0.43                                |       |
| <b>P01019 (Angiotensinogen)</b>                       |                                     |                                     | 0.037 |
| Min-Max                                               | 137709 -<br>1159487                 | 147931 -<br>682099                  |       |
| Mean                                                  | 677010                              | 478946                              |       |

|                                                              |                                  |                                  |       |
|--------------------------------------------------------------|----------------------------------|----------------------------------|-------|
| Median (Q1,Q3)                                               | 686761<br>(519703,<br>871019)    | 512997<br>(352909,<br>662496)    |       |
| Quartile coefficient of dispersion                           | 0.25                             | 0.3                              |       |
| <b>P02749 (Beta-2-glycoprotein 1)</b>                        |                                  |                                  | 0.044 |
| Min-Max                                                      | 56509 -<br>1169304               | 201327 -<br>464766               |       |
| Mean                                                         | 541356                           | 348704                           |       |
| Median (Q1,Q3)                                               | 488446<br>(355246,<br>760907)    | 350912<br>(261735,<br>446516)    |       |
| Quartile coefficient of dispersion                           | 0.36                             | 0.26                             |       |
| <b>P19823 (Inter-alpha-trypsin inhibitor heavy chain H2)</b> |                                  |                                  | 0.056 |
| Min-Max                                                      | 729341 -<br>3171013              | 834291 -<br>2068879              |       |
| Mean                                                         | 1780560                          | 1436200                          |       |
| Median (Q1,Q3)                                               | 1767384<br>(1484983,<br>2005710) | 1549345<br>(1319857,<br>1581386) |       |
| Quartile coefficient of dispersion                           | 0.15                             | 0.09                             |       |
| <b>P32119 (Peroxiredoxin-2)</b>                              |                                  |                                  | 0.056 |
| Min-Max                                                      | 36012 - 766092                   | 28774 - 127392                   |       |
| Mean                                                         | 141264                           | 78912                            |       |
| Median (Q1,Q3)                                               | 107451 (74532,<br>162120)        | 80482 (60335,<br>92560)          |       |
| Quartile coefficient of dispersion                           | 0.37                             | 0.21                             |       |
| <b>Q14624 (Inter-alpha-trypsin inhibitor heavy chain H4)</b> |                                  |                                  | 0.060 |
| Min-Max                                                      | 490176 -<br>4120163              | 568790 -<br>2437440              |       |
| Mean                                                         | 2145604                          | 1584043                          |       |
| Median (Q1,Q3)                                               | 2204921<br>(1744378,<br>2431096) | 1692654<br>(1143200,<br>2041087) |       |

|                                        |                                     |                                     |       |
|----------------------------------------|-------------------------------------|-------------------------------------|-------|
| Quartile coefficient of dispersion     | 0.16                                | 0.28                                |       |
| <b>P02787 (Serotransferrin)</b>        |                                     |                                     | 0.071 |
| Min-Max                                | 9847917 -<br>25900689               | 10361381 -<br>18522804              |       |
| Mean                                   | 17548875                            | 14668587                            |       |
| Median (Q1,Q3)                         | 17617716<br>(15307978,<br>20187456) | 14689258<br>(12383437,<br>16891429) |       |
| Quartile coefficient of dispersion     | 0.14                                | 0.15                                |       |
| <b>P00915 (Carbonic anhydrase 1)</b>   |                                     |                                     | 0.071 |
| Min-Max                                | 32184 -<br>1097373                  | 20227 - 110685                      |       |
| Mean                                   | 207366                              | 57991                               |       |
| Median (Q1,Q3)                         | 75716 (51485,<br>282951)            | 52932 (36028,<br>72638)             |       |
| Quartile coefficient of dispersion     | 0.69                                | 0.34                                |       |
| <b>P10909 (Clusterin)</b>              |                                     |                                     | 0.076 |
| Min-Max                                | 1264661 -<br>3996865                | 1018999 -<br>2779293                |       |
| Mean                                   | 2381176                             | 1870060                             |       |
| Median (Q1,Q3)                         | 2271576<br>(1893574,<br>2799610)    | 1866170<br>(1487033,<br>2179787)    |       |
| Quartile coefficient of dispersion     | 0.19                                | 0.19                                |       |
| <b>P20742 (Pregnancy zone protein)</b> |                                     |                                     | 0.076 |
| Min-Max                                | 7472 - 112104                       | 10875 - 49231                       |       |
| Mean                                   | 40409                               | 24558                               |       |
| Median (Q1,Q3)                         | 32290 (23374,<br>42495)             | 18408 (15458,<br>31921)             |       |
| Quartile coefficient of dispersion     | 0.29                                | 0.35                                |       |
| <b>P01024 (Complement C3)</b>          |                                     |                                     | 0.082 |

|                                             |                                  |                                  |       |
|---------------------------------------------|----------------------------------|----------------------------------|-------|
| Min-Max                                     | 1746065 -<br>11137908            | 1682627 -<br>8684874             |       |
| Mean                                        | 6979686                          | 5226601                          |       |
| Median (Q1,Q3)                              | 7587452<br>(4736200,<br>8491171) | 5368823<br>(4129150,<br>6103989) |       |
| Quartile coefficient of dispersion          | 0.28                             | 0.19                             |       |
| <b>P00450 (Ceruloplasmin)</b>               |                                  |                                  | 0.088 |
| Min-Max                                     | 953846 -<br>3575269              | 1203621 -<br>2590327             |       |
| Mean                                        | 2553162                          | 2132529                          |       |
| Median (Q1,Q3)                              | 2560285<br>(2166887,<br>2936375) | 2235804<br>(1968824,<br>2463766) |       |
| Quartile coefficient of dispersion          | 0.15                             | 0.11                             |       |
| <b>P09871 (Complement C1s subcomponent)</b> |                                  |                                  | 0.088 |
| Min-Max                                     | 91828 - 427834                   | 105661 -<br>277521               |       |
| Mean                                        | 220083                           | 171761                           |       |
| Median (Q1,Q3)                              | 203423<br>(177966,<br>253096)    | 169370<br>(149330,<br>184900)    |       |
| Quartile coefficient of dispersion          | 0.17                             | 0.11                             |       |
| <b>P02654 (Apolipoprotein C-I)</b>          |                                  |                                  | 0.088 |
| Min-Max                                     | 388454 -<br>2864062              | 470080 -<br>1550752              |       |
| Mean                                        | 1563911                          | 1131136                          |       |
| Median (Q1,Q3)                              | 1489515<br>(1144457,<br>2042632) | 1245277<br>(977319,<br>1348898)  |       |
| Quartile coefficient of dispersion          | 0.28                             | 0.16                             |       |
| <b>P19652 (Alpha-1-acid glycoprotein 2)</b> |                                  |                                  | 0.088 |
| Min-Max                                     | 996578 -<br>4198103              | 1240005 -<br>1613404             |       |

|                                                              |                                  |                                  |       |
|--------------------------------------------------------------|----------------------------------|----------------------------------|-------|
| Mean                                                         | 1959560                          | 1442926                          |       |
| Median (Q1,Q3)                                               | 1733767<br>(1412742,<br>2398621) | 1444711<br>(1364402,<br>1533956) |       |
| Quartile coefficient of dispersion                           | 0.26                             | 0.06                             |       |
| <b>P19827 (Inter-alpha-trypsin inhibitor heavy chain H1)</b> |                                  |                                  | 0.095 |
| Min-Max                                                      | 596883 -<br>3094317              | 572017 -<br>1610412              |       |
| Mean                                                         | 1523548                          | 1150994                          |       |
| Median (Q1,Q3)                                               | 1461853<br>(1046430,<br>1852136) | 1263532<br>(1017523,<br>1337547) |       |
| Quartile coefficient of dispersion                           | 0.28                             | 0.14                             |       |
| <b>P04004 (Vitronectin)</b>                                  |                                  |                                  | 0.095 |
| Min-Max                                                      | 1301529 -<br>5187862             | 1048719 -<br>3915051             |       |
| Mean                                                         | 2971785                          | 2388592                          |       |
| Median (Q1,Q3)                                               | 2925887<br>(2390483,<br>3408604) | 2173433<br>(1995989,<br>2912911) |       |
| Quartile coefficient of dispersion                           | 0.18                             | 0.19                             |       |
| <b>P25311 (Zinc-alpha-2-glycoprotein)</b>                    |                                  |                                  | 0.102 |
| Min-Max                                                      | 649967 -<br>2533847              | 1138458 -<br>2213197             |       |
| Mean                                                         | 1273333                          | 1505380                          |       |
| Median (Q1,Q3)                                               | 1286002<br>(1090644,<br>1414985) | 1349343<br>(1320890,<br>1592671) |       |
| Quartile coefficient of dispersion                           | 0.13                             | 0.09                             |       |
| <b>P00742 (Coagulation factor X)</b>                         |                                  |                                  | 0.102 |
| Min-Max                                                      | 32917 - 142858                   | 48080 - 72085                    |       |
| Mean                                                         | 77407                            | 59015                            |       |

|                                                    |                           |                           |       |
|----------------------------------------------------|---------------------------|---------------------------|-------|
| Median (Q1,Q3)                                     | 71622 (57815, 92595)      | 58534 (49988, 66327)      |       |
| Quartile coefficient of dispersion                 | 0.23                      | 0.14                      |       |
| <b>P68871 (Hemoglobin subunit beta)</b>            |                           |                           | 0.110 |
| Min-Max                                            | 175440 - 31066896         | 232399 - 4707689          |       |
| Mean                                               | 6481595                   | 1694692                   |       |
| Median (Q1,Q3)                                     | 1887353 (857031, 9445696) | 1452066 (387875, 2149624) |       |
| Quartile coefficient of dispersion                 | 0.83                      | 0.69                      |       |
| <b>P05546 (Heparin cofactor 2)</b>                 |                           |                           | 0.110 |
| Min-Max                                            | 304463 - 1899776          | 389390 - 1423889          |       |
| Mean                                               | 1042653                   | 820499                    |       |
| Median (Q1,Q3)                                     | 1079588 (716714, 1280902) | 745858 (556622, 1053529)  |       |
| Quartile coefficient of dispersion                 | 0.28                      | 0.31                      |       |
| <b>P07358 (Complement component C8 beta chain)</b> |                           |                           | 0.110 |
| Min-Max                                            | 80940 - 365631            | 69712 - 228656            |       |
| Mean                                               | 201374                    | 155982                    |       |
| Median (Q1,Q3)                                     | 218786 (134572, 241273)   | 142834 (120930, 203530)   |       |
| Quartile coefficient of dispersion                 | 0.28                      | 0.25                      |       |
| <b>P02743 (Serum amyloid P-component)</b>          |                           |                           | 0.110 |
| Min-Max                                            | 199820 - 914299           | 238512 - 721619           |       |
| Mean                                               | 571032                    | 448394                    |       |
| Median (Q1,Q3)                                     | 585780 (406572, 743827)   | 401083 (330162, 575279)   |       |

|                                                  |                                  |                                  |       |
|--------------------------------------------------|----------------------------------|----------------------------------|-------|
| Quartile coefficient of dispersion               | 0.29                             | 0.27                             |       |
| <b>000391 (Sulfhydryl oxidase 1)</b>             |                                  |                                  | 0.110 |
| Min-Max                                          | 12276 - 300422                   | 13545 - 151610                   |       |
| Mean                                             | 54275                            | 35049                            |       |
| Median (Q1,Q3)                                   | 26182 (19021,<br>78124)          | 18436 (16637,<br>22968)          |       |
| Quartile coefficient of dispersion               | 0.61                             | 0.16                             |       |
| <b>P02042 (Hemoglobin subunit delta)</b>         |                                  |                                  | 0.110 |
| Min-Max                                          | 9151 - 822709                    | 14856 - 86703                    |       |
| Mean                                             | 180900                           | 48361                            |       |
| Median (Q1,Q3)                                   | 105702 (32979,<br>226254)        | 46337 (31139,<br>65960)          |       |
| Quartile coefficient of dispersion               | 0.75                             | 0.36                             |       |
| <b>P01008 (Antithrombin-III)</b>                 |                                  |                                  | 0.118 |
| Min-Max                                          | 508634 -<br>1859548              | 519105 -<br>1624816              |       |
| Mean                                             | 1281486                          | 1022972                          |       |
| Median (Q1,Q3)                                   | 1307321<br>(895972,<br>1677777)  | 1018850<br>(603030,<br>1339527)  |       |
| Quartile coefficient of dispersion               | 0.3                              | 0.38                             |       |
| <b>P01871 (Immunoglobulin heavy constant mu)</b> |                                  |                                  | 0.118 |
| Min-Max                                          | 925993 -<br>8721681              | 1369985 -<br>4483848             |       |
| Mean                                             | 3759780                          | 2652999                          |       |
| Median (Q1,Q3)                                   | 3404702<br>(2290810,<br>4898033) | 2717607<br>(2029429,<br>3021727) |       |
| Quartile coefficient of dispersion               | 0.36                             | 0.2                              |       |
| <b>P05156 (Complement factor I)</b>              |                                  |                                  | 0.118 |



|                                          |                                  |                                  |       |
|------------------------------------------|----------------------------------|----------------------------------|-------|
| Min-Max                                  | 130369 -<br>631258               | 158557 -<br>426556               |       |
| Mean                                     | 362631                           | 283979                           |       |
| Median (Q1,Q3)                           | 342273<br>(244783,<br>441818)    | 276037<br>(199689,<br>348525)    |       |
| Quartile coefficient of dispersion       | 0.29                             | 0.27                             |       |
| <b>P08603 (Complement factor H)</b>      |                                  |                                  | 0.126 |
| Min-Max                                  | 710494 -<br>1996111              | 552486 -<br>1144871              |       |
| Mean                                     | 1099158                          | 924732                           |       |
| Median (Q1,Q3)                           | 1067216<br>(898353,<br>1220586)  | 930414<br>(864092,<br>1056757)   |       |
| Quartile coefficient of dispersion       | 0.15                             | 0.1                              |       |
| <b>P01042 (Kininogen-1)</b>              |                                  |                                  | 0.126 |
| Min-Max                                  | 1183463 -<br>3533273             | 1418544 -<br>2804195             |       |
| Mean                                     | 2528164                          | 2178966                          |       |
| Median (Q1,Q3)                           | 2609633<br>(2049227,<br>3001365) | 2229574<br>(1882781,<br>2528366) |       |
| Quartile coefficient of dispersion       | 0.19                             | 0.15                             |       |
| <b>P02652 (Apolipoprotein A-II)</b>      |                                  |                                  | 0.144 |
| Min-Max                                  | 1063845 -<br>6743155             | 2871098 -<br>5625528             |       |
| Mean                                     | 3303624                          | 3884846                          |       |
| Median (Q1,Q3)                           | 3025588<br>(2265192,<br>4108029) | 3382875<br>(3062915,<br>4886732) |       |
| Quartile coefficient of dispersion       | 0.29                             | 0.23                             |       |
| <b>P69905 (Hemoglobin subunit alpha)</b> |                                  |                                  | 0.144 |
| Min-Max                                  | 296171 -<br>22828327             | 324713 -<br>4413238              |       |

|                                                 |                                  |                                  |       |
|-------------------------------------------------|----------------------------------|----------------------------------|-------|
| Mean                                            | 5556441                          | 2056674                          |       |
| Median (Q1,Q3)                                  | 2556619<br>(1227559,<br>8941966) | 1990975<br>(585750,<br>2835821)  |       |
| Quartile coefficient of dispersion              | 0.76                             | 0.66                             |       |
| <b>P02679 (Fibrinogen gamma chain)</b>          |                                  |                                  | 0.164 |
| Min-Max                                         | 32923 - 287331                   | 39305 - 93616                    |       |
| Mean                                            | 91894                            | 60991                            |       |
| Median (Q1,Q3)                                  | 76462 (54605,<br>95301)          | 58469 (50508,<br>69185)          |       |
| Quartile coefficient of dispersion              | 0.27                             | 0.16                             |       |
| <b>P13645 (Keratin, type I cytoskeletal 10)</b> |                                  |                                  | 0.164 |
| Min-Max                                         | 36136 - 503761                   | 28923 - 625327                   |       |
| Mean                                            | 211077                           | 341704                           |       |
| Median (Q1,Q3)                                  | 205579<br>(107312,<br>297895)    | 385301<br>(165536,<br>509230)    |       |
| Quartile coefficient of dispersion              | 0.47                             | 0.51                             |       |
| <b>P01034 (Cystatin-C)</b>                      |                                  |                                  | 0.164 |
| Min-Max                                         | 5591 - 72790                     | 13665 - 67434                    |       |
| Mean                                            | 23370                            | 30939                            |       |
| Median (Q1,Q3)                                  | 20200 (15395,<br>23790)          | 25841 (19694,<br>36556)          |       |
| Quartile coefficient of dispersion              | 0.21                             | 0.3                              |       |
| <b>P02774 (Vitamin D-binding protein)</b>       |                                  |                                  | 0.175 |
| Min-Max                                         | 1201721 -<br>3325668             | 1234349 -<br>2357953             |       |
| Mean                                            | 2003885                          | 1707655                          |       |
| Median (Q1,Q3)                                  | 1866633<br>(1589260,<br>2420938) | 1594873<br>(1436519,<br>1975716) |       |

|                                                                         |                               |                               |       |
|-------------------------------------------------------------------------|-------------------------------|-------------------------------|-------|
| Quartile coefficient of dispersion                                      | 0.21                          | 0.16                          |       |
| <b>P00748 (Coagulation factor XII)</b>                                  |                               |                               | 0.175 |
| Min-Max                                                                 | 48483 - 734964                | 88008 - 194082                |       |
| Mean                                                                    | 187935                        | 137917                        |       |
| Median (Q1,Q3)                                                          | 163014<br>(136803,<br>219763) | 138706<br>(102130,<br>165874) |       |
| Quartile coefficient of dispersion                                      | 0.23                          | 0.24                          |       |
| <b>A0A0C4DH68 (Immunoglobulin kappa variable 2-24)</b>                  |                               |                               | 0.175 |
| Min-Max                                                                 | 55703 - 577342                | 118700 -<br>174307            |       |
| Mean                                                                    | 144038                        | 146728                        |       |
| Median (Q1,Q3)                                                          | 119496 (94083,<br>160417)     | 143107<br>(130773,<br>165199) |       |
| Quartile coefficient of dispersion                                      | 0.26                          | 0.12                          |       |
| <b>P02538 (Keratin, type II cytoskeletal 6A)</b>                        |                               |                               | 0.186 |
| Min-Max                                                                 | 36901 - 109000                | 27962 - 104099                |       |
| Mean                                                                    | 66105                         | 54876                         |       |
| Median (Q1,Q3)                                                          | 61783 (52567,<br>79880)       | 49284 (37375,<br>66647)       |       |
| Quartile coefficient of dispersion                                      | 0.21                          | 0.28                          |       |
| <b>Q9Y5Y7 (Lymphatic vessel endothelial hyaluronic acid receptor 1)</b> |                               |                               | 0.198 |
| Min-Max                                                                 | 7723 - 51109                  | 10104 - 25086                 |       |
| Mean                                                                    | 22245                         | 16510                         |       |
| Median (Q1,Q3)                                                          | 19912 (16797,<br>27823)       | 15257 (10693,<br>22429)       |       |
| Quartile coefficient of dispersion                                      | 0.25                          | 0.35                          |       |
| <b>P01031 (Complement C5)</b>                                           |                               |                               | 0.211 |

|                                            |                                  |                                |       |
|--------------------------------------------|----------------------------------|--------------------------------|-------|
| Min-Max                                    | 259223 -<br>1056965              | 384816 -<br>790077             |       |
| Mean                                       | 568727                           | 502579                         |       |
| Median (Q1,Q3)                             | 555791<br>(469347,<br>619004)    | 465460<br>(407536,<br>539396)  |       |
| Quartile coefficient of dispersion         | 0.14                             | 0.14                           |       |
| <b>P43652 (Afamin)</b>                     |                                  |                                | 0.211 |
| Min-Max                                    | 188516 -<br>973473               | 263403 -<br>672068             |       |
| Mean                                       | 563649                           | 487940                         |       |
| Median (Q1,Q3)                             | 585279<br>(447839,<br>676914)    | 530390<br>(372132,<br>575294)  |       |
| Quartile coefficient of dispersion         | 0.2                              | 0.21                           |       |
| <b>P06681 (Complement C2)</b>              |                                  |                                | 0.211 |
| Min-Max                                    | 159450 -<br>931182               | 156455 -<br>297253             |       |
| Mean                                       | 267471                           | 210673                         |       |
| Median (Q1,Q3)                             | 230903<br>(202658,<br>260421)    | 211741<br>(188341,<br>220830)  |       |
| Quartile coefficient of dispersion         | 0.12                             | 0.08                           |       |
| <b>P02766 (Transthyretin)</b>              |                                  |                                | 0.211 |
| Min-Max                                    | 287418 -<br>5310922              | 609623 -<br>2468366            |       |
| Mean                                       | 1580041                          | 1223749                        |       |
| Median (Q1,Q3)                             | 1276872<br>(1026463,<br>2076808) | 956296<br>(866952,<br>1417409) |       |
| Quartile coefficient of dispersion         | 0.34                             | 0.24                           |       |
| <b>Q08380 (Galectin-3-binding protein)</b> |                                  |                                | 0.211 |
| Min-Max                                    | 31111 - 194737                   | 26628 - 148775                 |       |

|                                                              |                         |                         |       |
|--------------------------------------------------------------|-------------------------|-------------------------|-------|
| Mean                                                         | 78785                   | 64611                   |       |
| Median (Q1,Q3)                                               | 69831 (54754, 85529)    | 58093 (48320, 61851)    |       |
| Quartile coefficient of dispersion                           | 0.22                    | 0.12                    |       |
| <b>P17936 (Insulin-like growth factor-binding protein 3)</b> |                         |                         | 0.211 |
| Min-Max                                                      | 11676 - 80692           | 17407 - 39702           |       |
| Mean                                                         | 39038                   | 31021                   |       |
| Median (Q1,Q3)                                               | 37552 (24973, 47385)    | 33535 (27752, 35914)    |       |
| Quartile coefficient of dispersion                           | 0.31                    | 0.13                    |       |
| <b>P10643 (Complement component C7)</b>                      |                         |                         | 0.223 |
| Min-Max                                                      | 124514 - 765490         | 166191 - 309387         |       |
| Mean                                                         | 307305                  | 247263                  |       |
| Median (Q1,Q3)                                               | 280741 (235752, 367975) | 248344 (216679, 295790) |       |
| Quartile coefficient of dispersion                           | 0.22                    | 0.15                    |       |
| <b>P02760 (Protein AMBP)</b>                                 |                         |                         | 0.237 |
| Min-Max                                                      | 76414 - 878459          | 76817 - 1116262         |       |
| Mean                                                         | 488325                  | 610191                  |       |
| Median (Q1,Q3)                                               | 474989 (272930, 693242) | 594507 (539801, 701933) |       |
| Quartile coefficient of dispersion                           | 0.44                    | 0.13                    |       |
| <b>P04275 (von Willebrand factor)</b>                        |                         |                         | 0.251 |
| Min-Max                                                      | 32888 - 263254          | 16864 - 111114          |       |
| Mean                                                         | 87735                   | 65911                   |       |
| Median (Q1,Q3)                                               | 77960 (54621, 97625)    | 74063 (42489, 81204)    |       |

|                                                       |                                |                                 |       |
|-------------------------------------------------------|--------------------------------|---------------------------------|-------|
| Quartile coefficient of dispersion                    | 0.28                           | 0.31                            |       |
| <b>P05090 (Apolipoprotein D)</b>                      |                                |                                 | 0.251 |
| Min-Max                                               | 338171 -<br>1686498            | 488310 -<br>1070242             |       |
| Mean                                                  | 736051                         | 820940                          |       |
| Median (Q1,Q3)                                        | 719305<br>(529754,<br>870852)  | 885159<br>(699958,<br>954142)   |       |
| Quartile coefficient of dispersion                    | 0.24                           | 0.15                            |       |
| <b>P0C0L5 (Complement C4-B)</b>                       |                                |                                 | 0.251 |
| Min-Max                                               | 36738 - 459702                 | 31124 - 276160                  |       |
| Mean                                                  | 172087                         | 124626                          |       |
| Median (Q1,Q3)                                        | 194521 (75740,<br>232762)      | 94572 (72770,<br>176383)        |       |
| Quartile coefficient of dispersion                    | 0.51                           | 0.42                            |       |
| <b>P15169 (Carboxypeptidase N catalytic chain)</b>    |                                |                                 | 0.251 |
| Min-Max                                               | 11755 - 381594                 | 14520 - 57175                   |       |
| Mean                                                  | 54860                          | 35493                           |       |
| Median (Q1,Q3)                                        | 44930 (35023,<br>55400)        | 34670 (20418,<br>52280)         |       |
| Quartile coefficient of dispersion                    | 0.23                           | 0.44                            |       |
| <b>P01860 (Immunoglobulin heavy constant gamma 3)</b> |                                |                                 | 0.251 |
| Min-Max                                               | 47805 -<br>3471666             | 120386 -<br>3602621             |       |
| Mean                                                  | 1047819                        | 1407784                         |       |
| Median (Q1,Q3)                                        | 811484<br>(462867,<br>1681779) | 1206095<br>(831689,<br>1714008) |       |
| Quartile coefficient of dispersion                    | 0.57                           | 0.35                            |       |
| <b>P01876 (Immunoglobulin heavy constant alpha 1)</b> |                                |                                 | 0.266 |

|                                                              |                                   |                                   |       |
|--------------------------------------------------------------|-----------------------------------|-----------------------------------|-------|
| Min-Max                                                      | 146137 -<br>22886824              | 6948247 -<br>21664617             |       |
| Mean                                                         | 8478667                           | 10850065                          |       |
| Median (Q1,Q3)                                               | 8745899<br>(6499732,<br>10233352) | 9337267<br>(8609602,<br>10751933) |       |
| Quartile coefficient of dispersion                           | 0.22                              | 0.11                              |       |
| <b>P29622 (Kallistatin)</b>                                  |                                   |                                   | 0.281 |
| Min-Max                                                      | 87065 - 662480                    | 96992 - 273268                    |       |
| Mean                                                         | 236640                            | 189151                            |       |
| Median (Q1,Q3)                                               | 217047<br>(177131,<br>267847)     | 198998<br>(158165,<br>220522)     |       |
| Quartile coefficient of dispersion                           | 0.2                               | 0.16                              |       |
| <b>Q96IY4 (Carboxypeptidase B2)</b>                          |                                   |                                   | 0.281 |
| Min-Max                                                      | 40633 - 135787                    | 34210 - 113807                    |       |
| Mean                                                         | 71265                             | 62992                             |       |
| Median (Q1,Q3)                                               | 67548 (60543,<br>77936)           | 63233 (47013,<br>67762)           |       |
| Quartile coefficient of dispersion                           | 0.13                              | 0.18                              |       |
| <b>Q06033 (Inter-alpha-trypsin inhibitor heavy chain H3)</b> |                                   |                                   | 0.297 |
| Min-Max                                                      | 90921 -<br>1731505                | 152897 -<br>316337                |       |
| Mean                                                         | 294490                            | 223751                            |       |
| Median (Q1,Q3)                                               | 246020<br>(203601,<br>287491)     | 209488<br>(183908,<br>254171)     |       |
| Quartile coefficient of dispersion                           | 0.17                              | 0.16                              |       |
| <b>P18428 (Lipopolysaccharide-binding protein)</b>           |                                   |                                   | 0.297 |
| Min-Max                                                      | 63004 - 705125                    | 72880 - 293668                    |       |
| Mean                                                         | 208531                            | 164408                            |       |

|                                               |                                     |                                     |       |
|-----------------------------------------------|-------------------------------------|-------------------------------------|-------|
| Median (Q1,Q3)                                | 177004<br>(144192,<br>214395)       | 143465<br>(120545,<br>200686)       |       |
| Quartile coefficient of dispersion            | 0.2                                 | 0.25                                |       |
| <b>P02671 (Fibrinogen alpha chain)</b>        |                                     |                                     | 0.313 |
| Min-Max                                       | 55420 - 634019                      | 58309 - 123471                      |       |
| Mean                                          | 131312                              | 91311                               |       |
| Median (Q1,Q3)                                | 91963 (76930,<br>144273)            | 94576 (64881,<br>115410)            |       |
| Quartile coefficient of dispersion            | 0.3                                 | 0.28                                |       |
| <b>P02675 (Fibrinogen beta chain)</b>         |                                     |                                     | 0.313 |
| Min-Max                                       | 63289 - 347320                      | 71380 - 192038                      |       |
| Mean                                          | 141444                              | 108917                              |       |
| Median (Q1,Q3)                                | 116020 (86432,<br>156544)           | 88183 (83546,<br>126580)            |       |
| Quartile coefficient of dispersion            | 0.29                                | 0.2                                 |       |
| <b>P01834 (Immunoglobulin kappa constant)</b> |                                     |                                     | 0.313 |
| Min-Max                                       | 8039875 -<br>39711275               | 10704840 -<br>38034915              |       |
| Mean                                          | 22516663                            | 25958345                            |       |
| Median (Q1,Q3)                                | 23851235<br>(15342169,<br>28685033) | 26056836<br>(22248716,<br>31662261) |       |
| Quartile coefficient of dispersion            | 0.3                                 | 0.17                                |       |
| <b>P02775 (Platelet basic protein)</b>        |                                     |                                     | 0.313 |
| Min-Max                                       | 74877 - 993155                      | 340870 -<br>702108                  |       |
| Mean                                          | 442630                              | 478682                              |       |
| Median (Q1,Q3)                                | 380165<br>(307478,<br>527889)       | 438373<br>(388897,<br>520626)       |       |
| Quartile coefficient of dispersion            | 0.26                                | 0.14                                |       |



|                                                                            |                               |                               |       |
|----------------------------------------------------------------------------|-------------------------------|-------------------------------|-------|
| <b>P00740 (Coagulation factor IX)</b>                                      |                               |                               | 0.313 |
| Min-Max                                                                    | 3916 - 88285                  | 6643 - 49522                  |       |
| Mean                                                                       | 24670                         | 25970                         |       |
| Median (Q1,Q3)                                                             | 21106 (12600,<br>28364)       | 27568 (19772,<br>29403)       |       |
| Quartile coefficient of dispersion                                         | 0.38                          | 0.2                           |       |
| <b>P0DJI8 (Serum amyloid A-1 protein)</b>                                  |                               |                               | 0.330 |
| Min-Max                                                                    | 46666 - 717250                | 80711 - 415639                |       |
| Mean                                                                       | 211489                        | 248812                        |       |
| Median (Q1,Q3)                                                             | 147793<br>(100259,<br>271366) | 260180<br>(174084,<br>324518) |       |
| Quartile coefficient of dispersion                                         | 0.46                          | 0.3                           |       |
| <b>O75636 (Ficolin-3)</b>                                                  |                               |                               | 0.330 |
| Min-Max                                                                    | 103544 -<br>481080            | 116464 -<br>201859            |       |
| Mean                                                                       | 179008                        | 156931                        |       |
| Median (Q1,Q3)                                                             | 173722<br>(143988,<br>194378) | 158814<br>(139136,<br>172102) |       |
| Quartile coefficient of dispersion                                         | 0.15                          | 0.11                          |       |
| <b>Q15582 (Transforming growth factor-<br/>beta-induced protein ig-h3)</b> |                               |                               | 0.330 |
| Min-Max                                                                    | 10574 - 101942                | 14833 - 51792                 |       |
| Mean                                                                       | 30206                         | 32192                         |       |
| Median (Q1,Q3)                                                             | 26946 (19052,<br>33914)       | 32349 (28338,<br>36834)       |       |
| Quartile coefficient of dispersion                                         | 0.28                          | 0.13                          |       |
| <b>A0A0B4J2H0 (Immunoglobulin heavy<br/>variable 1-69D)</b>                |                               |                               | 0.330 |
| Min-Max                                                                    | 39763 - 351067                | 54795 - 186209                |       |
| Mean                                                                       | 121886                        | 92703                         |       |

|                                                 |                                |                                |       |
|-------------------------------------------------|--------------------------------|--------------------------------|-------|
| Median (Q1,Q3)                                  | 112557 (69302,<br>136169)      | 77280 (67486,<br>103839)       |       |
| Quartile coefficient of dispersion              | 0.33                           | 0.21                           |       |
| <b>P00736 (Complement C1r subcomponent)</b>     |                                |                                | 0.348 |
| Min-Max                                         | 159012 -<br>488690             | 169209 -<br>282187             |       |
| Mean                                            | 264107                         | 231673                         |       |
| Median (Q1,Q3)                                  | 252569<br>(220863,<br>300778)  | 235859<br>(202708,<br>259853)  |       |
| Quartile coefficient of dispersion              | 0.15                           | 0.12                           |       |
| <b>P08185 (Corticosteroid-binding globulin)</b> |                                |                                | 0.348 |
| Min-Max                                         | 150842 -<br>952794             | 155401 -<br>498071             |       |
| Mean                                            | 438999                         | 363555                         |       |
| Median (Q1,Q3)                                  | 420370<br>(349754,<br>493085)  | 382671<br>(308245,<br>467581)  |       |
| Quartile coefficient of dispersion              | 0.17                           | 0.21                           |       |
| <b>P04003 (C4b-binding protein alpha chain)</b> |                                |                                | 0.366 |
| Min-Max                                         | 222159 -<br>1639497            | 294021 -<br>1278791            |       |
| Mean                                            | 877348                         | 752672                         |       |
| Median (Q1,Q3)                                  | 737473<br>(550113,<br>1252470) | 728581<br>(437897,<br>1015649) |       |
| Quartile coefficient of dispersion              | 0.39                           | 0.4                            |       |
| <b>P03952 (Plasma kallikrein)</b>               |                                |                                | 0.366 |
| Min-Max                                         | 91720 - 303213                 | 97232 - 275717                 |       |
| Mean                                            | 201726                         | 180662                         |       |

|                                                     |                                     |                                     |       |
|-----------------------------------------------------|-------------------------------------|-------------------------------------|-------|
| Median (Q1,Q3)                                      | 204128<br>(155014,<br>256163)       | 176475<br>(155802,<br>217046)       |       |
| Quartile coefficient of dispersion                  | 0.25                                | 0.16                                |       |
| <b>P07357 (Complement component C8 alpha chain)</b> |                                     |                                     | 0.366 |
| Min-Max                                             | 128337 -<br>628348                  | 109476 -<br>354873                  |       |
| Mean                                                | 234189                              | 201661                              |       |
| Median (Q1,Q3)                                      | 194888<br>(172844,<br>269502)       | 182685<br>(149321,<br>232125)       |       |
| Quartile coefficient of dispersion                  | 0.22                                | 0.22                                |       |
| <b>P43251 (Biotinidase)</b>                         |                                     |                                     | 0.366 |
| Min-Max                                             | 36103 - 199200                      | 49413 - 112687                      |       |
| Mean                                                | 82666                               | 73341                               |       |
| Median (Q1,Q3)                                      | 74171 (61639,<br>98478)             | 64187 (55269,<br>85188)             |       |
| Quartile coefficient of dispersion                  | 0.23                                | 0.21                                |       |
| <b>P07477 (Trypsin-1)</b>                           |                                     |                                     | 0.366 |
| Min-Max                                             | 19547 - 366899                      | 11523 - 92154                       |       |
| Mean                                                | 64433                               | 43034                               |       |
| Median (Q1,Q3)                                      | 44898 (31738,<br>76290)             | 38709 (28810,<br>52711)             |       |
| Quartile coefficient of dispersion                  | 0.41                                | 0.29                                |       |
| <b>P02647 (Apolipoprotein A-I)</b>                  |                                     |                                     | 0.385 |
| Min-Max                                             | 20196120 -<br>51154626              | 22688896 -<br>48845735              |       |
| Mean                                                | 38185789                            | 39660379                            |       |
| Median (Q1,Q3)                                      | 38878276<br>(33016133,<br>43710606) | 42312439<br>(37460404,<br>44510749) |       |
| Quartile coefficient of dispersion                  | 0.14                                | 0.09                                |       |

|                                                   |                                  |                                  |       |
|---------------------------------------------------|----------------------------------|----------------------------------|-------|
| <b>P01011 (Alpha-1-antichymotrypsin)</b>          |                                  |                                  | 0.385 |
| Min-Max                                           | 634921 -<br>14266570             | 880311 -<br>5223684              |       |
| Mean                                              | 3319673                          | 2535023                          |       |
| Median (Q1,Q3)                                    | 3234318<br>(2185059,<br>4045015) | 2194835<br>(1178295,<br>3566471) |       |
| Quartile coefficient of dispersion                | 0.3                              | 0.5                              |       |
| <b>P00747 (Plasminogen)</b>                       |                                  |                                  | 0.385 |
| Min-Max                                           | 594580 -<br>2164693              | 569357 -<br>1259705              |       |
| Mean                                              | 1024346                          | 909489                           |       |
| Median (Q1,Q3)                                    | 986005<br>(829266,<br>1192674)   | 877998<br>(722639,<br>1109716)   |       |
| Quartile coefficient of dispersion                | 0.18                             | 0.21                             |       |
| <b>P07225 (Vitamin K-dependent protein S)</b>     |                                  |                                  | 0.385 |
| Min-Max                                           | 112911 -<br>509863               | 214993 -<br>391218               |       |
| Mean                                              | 323423                           | 300559                           |       |
| Median (Q1,Q3)                                    | 344269<br>(257230,<br>386123)    | 312524<br>(252112,<br>343187)    |       |
| Quartile coefficient of dispersion                | 0.2                              | 0.15                             |       |
| <b>P01602 (Immunoglobulin kappa variable 1-5)</b> |                                  |                                  | 0.404 |
| Min-Max                                           | 35390 - 338419                   | 51807 - 457874                   |       |
| Mean                                              | 124642                           | 179480                           |       |
| Median (Q1,Q3)                                    | 92960 (64716,<br>159123)         | 129092 (82174,<br>200718)        |       |
| Quartile coefficient of dispersion                | 0.42                             | 0.42                             |       |
| <b>P04217 (Alpha-1B-glycoprotein)</b>             |                                  |                                  | 0.424 |

|                                                       |                                  |                                  |       |
|-------------------------------------------------------|----------------------------------|----------------------------------|-------|
| Min-Max                                               | 801928 -<br>2798543              | 1592396 -<br>2842390             |       |
| Mean                                                  | 2044772                          | 2161286                          |       |
| Median (Q1,Q3)                                        | 1950036<br>(1743566,<br>2437535) | 2094196<br>(1915989,<br>2356696) |       |
| Quartile coefficient of dispersion                    | 0.17                             | 0.1                              |       |
| <b>P01782 (Immunoglobulin heavy variable 3-9)</b>     |                                  |                                  | 0.424 |
| Min-Max                                               | 15565 -<br>1225023               | 23607 - 86656                    |       |
| Mean                                                  | 95205                            | 50373                            |       |
| Median (Q1,Q3)                                        | 54647 (34354,<br>64532)          | 45420 (35527,<br>61118)          |       |
| Quartile coefficient of dispersion                    | 0.31                             | 0.26                             |       |
| <b>P01859 (Immunoglobulin heavy constant gamma 2)</b> |                                  |                                  | 0.444 |
| Min-Max                                               | 1068510 -<br>4171201             | 1500891 -<br>3467956             |       |
| Mean                                                  | 2528040                          | 2758375                          |       |
| Median (Q1,Q3)                                        | 2515997<br>(1801456,<br>3246819) | 3047268<br>(2114571,<br>3376611) |       |
| Quartile coefficient of dispersion                    | 0.29                             | 0.23                             |       |
| <b>P05154 (Plasma serine protease inhibitor)</b>      |                                  |                                  | 0.444 |
| Min-Max                                               | 83465 - 465865                   | 57947 - 224940                   |       |
| Mean                                                  | 148929                           | 127938                           |       |
| Median (Q1,Q3)                                        | 132039<br>(106762,<br>163319)    | 111103 (90667,<br>167991)        |       |
| Quartile coefficient of dispersion                    | 0.21                             | 0.3                              |       |
| <b>P02533 (Keratin, type I cytoskeletal 14)</b>       |                                  |                                  | 0.444 |

|                                                       |                               |                               |       |
|-------------------------------------------------------|-------------------------------|-------------------------------|-------|
| Min-Max                                               | 33543 -<br>2030448            | 71290 - 303749                |       |
| Mean                                                  | 189057                        | 126071                        |       |
| Median (Q1,Q3)                                        | 87938 (66861,<br>128356)      | 87213 (80471,<br>145783)      |       |
| Quartile coefficient of dispersion                    | 0.32                          | 0.29                          |       |
| <b>P35542 (Serum amyloid A-4 protein)</b>             |                               |                               | 0.444 |
| Min-Max                                               | 119483 -<br>697620            | 196963 -<br>876983            |       |
| Mean                                                  | 392229                        | 463482                        |       |
| Median (Q1,Q3)                                        | 383291<br>(313052,<br>443761) | 441336<br>(314058,<br>561797) |       |
| Quartile coefficient of dispersion                    | 0.17                          | 0.28                          |       |
| <b>P09172 (Dopamine beta-hydroxylase)</b>             |                               |                               | 0.444 |
| Min-Max                                               | 8088 - 119789                 | 9881 - 49393                  |       |
| Mean                                                  | 33768                         | 25883                         |       |
| Median (Q1,Q3)                                        | 26743 (17994,<br>44559)       | 24623 (15081,<br>34032)       |       |
| Quartile coefficient of dispersion                    | 0.42                          | 0.39                          |       |
| <b>P0C0L4 (Complement C4-A)</b>                       |                               |                               | 0.465 |
| Min-Max                                               | 129570 -<br>937236            | 146646 -<br>528941            |       |
| Mean                                                  | 357039                        | 300433                        |       |
| Median (Q1,Q3)                                        | 329018<br>(226605,<br>431544) | 291033<br>(173480,<br>384681) |       |
| Quartile coefficient of dispersion                    | 0.31                          | 0.38                          |       |
| <b>P02746 (Complement C1q subcomponent subunit B)</b> |                               |                               | 0.465 |
| Min-Max                                               | 85132 - 640739                | 111052 -<br>214810            |       |
| Mean                                                  | 194900                        | 162763                        |       |

|                                              |                                  |                                  |       |
|----------------------------------------------|----------------------------------|----------------------------------|-------|
| Median (Q1,Q3)                               | 169740<br>(157592,<br>203310)    | 168012<br>(146181,<br>180521)    |       |
| Quartile coefficient of dispersion           | 0.13                             | 0.11                             |       |
| <b>P05452 (Tetranectin)</b>                  |                                  |                                  | 0.465 |
| Min-Max                                      | 52877 - 268264                   | 45333 - 128934                   |       |
| Mean                                         | 103112                           | 90199                            |       |
| Median (Q1,Q3)                               | 94524 (76950,<br>122140)         | 96357 (71704,<br>105364)         |       |
| Quartile coefficient of dispersion           | 0.23                             | 0.19                             |       |
| <b>P05155 (Plasma protease C1 inhibitor)</b> |                                  |                                  | 0.487 |
| Min-Max                                      | 1771406 -<br>4459707             | 1818112 -<br>3785215             |       |
| Mean                                         | 2987772                          | 2775924                          |       |
| Median (Q1,Q3)                               | 2886636<br>(2570355,<br>3404009) | 2741713<br>(2395823,<br>3180431) |       |
| Quartile coefficient of dispersion           | 0.14                             | 0.14                             |       |
| <b>P02649 (Apolipoprotein E)</b>             |                                  |                                  | 0.487 |
| Min-Max                                      | 374098 -<br>1412469              | 375876 -<br>1851705              |       |
| Mean                                         | 842278                           | 984314                           |       |
| Median (Q1,Q3)                               | 849646<br>(636224,<br>935769)    | 938887<br>(522317,<br>1334961)   |       |
| Quartile coefficient of dispersion           | 0.19                             | 0.44                             |       |
| <b>P13671 (Complement component C6)</b>      |                                  |                                  | 0.487 |
| Min-Max                                      | 168958 -<br>599193               | 167885 -<br>393608               |       |
| Mean                                         | 273848                           | 278679                           |       |
| Median (Q1,Q3)                               | 233674<br>(206462,<br>315502)    | 257949<br>(235255,<br>339678)    |       |

|                                                          |                       |                      |       |
|----------------------------------------------------------|-----------------------|----------------------|-------|
| Quartile coefficient of dispersion                       | 0.21                  | 0.18                 |       |
| <b>Q16610 (Extracellular matrix protein 1)</b>           |                       |                      | 0.487 |
| Min-Max                                                  | 25373 - 179609        | 24520 - 100910       |       |
| Mean                                                     | 65617                 | 55277                |       |
| Median (Q1,Q3)                                           | 62427 (43502, 73921)  | 50327 (42559, 66410) |       |
| Quartile coefficient of dispersion                       | 0.26                  | 0.22                 |       |
| <b>P11226 (Mannose-binding protein C)</b>                |                       |                      | 0.487 |
| Min-Max                                                  | 17530 - 278141        | 14590 - 81953        |       |
| Mean                                                     | 56847                 | 43769                |       |
| Median (Q1,Q3)                                           | 47029 (29652, 67715)  | 39745 (33543, 52110) |       |
| Quartile coefficient of dispersion                       | 0.39                  | 0.22                 |       |
| <b>P13796 (Plastin-2)</b>                                |                       |                      | 0.487 |
| Min-Max                                                  | 7819 - 256459         | 20462 - 166094       |       |
| Mean                                                     | 103078                | 78794                |       |
| Median (Q1,Q3)                                           | 96712 (30036, 148555) | 64257 (56795, 89138) |       |
| Quartile coefficient of dispersion                       | 0.66                  | 0.22                 |       |
| <b>Q9NZP8 (Complement C1r subcomponent-like protein)</b> |                       |                      | 0.487 |
| Min-Max                                                  | 40918 - 184790        | 43871 - 105692       |       |
| Mean                                                     | 69684                 | 61884                |       |
| Median (Q1,Q3)                                           | 58961 (52961, 74438)  | 56671 (45986, 69613) |       |
| Quartile coefficient of dispersion                       | 0.17                  | 0.2                  |       |
| <b>P04433 (Immunoglobulin kappa variable 3-11)</b>       |                       |                      | 0.487 |
| Min-Max                                                  | 18978 - 1173626       | 205161 - 1026666     |       |



|                                                          |                               |                               |       |
|----------------------------------------------------------|-------------------------------|-------------------------------|-------|
| Mean                                                     | 369094                        | 426504                        |       |
| Median (Q1,Q3)                                           | 288057<br>(212244,<br>398917) | 297820<br>(254629,<br>535238) |       |
| Quartile coefficient of dispersion                       | 0.31                          | 0.36                          |       |
| <b>P02748 (Complement component C9)</b>                  |                               |                               | 0.509 |
| Min-Max                                                  | 319168 -<br>1264618           | 505632 -<br>958407            |       |
| Mean                                                     | 756733                        | 787340                        |       |
| Median (Q1,Q3)                                           | 711092<br>(536040,<br>970282) | 825044<br>(721606,<br>928252) |       |
| Quartile coefficient of dispersion                       | 0.29                          | 0.13                          |       |
| <b>B9A064 (Immunoglobulin lambda-like polypeptide 5)</b> |                               |                               | 0.509 |
| Min-Max                                                  | 27429 - 201194                | 27241 - 131289                |       |
| Mean                                                     | 98471                         | 84002                         |       |
| Median (Q1,Q3)                                           | 90991 (67930,<br>129162)      | 90995 (49425,<br>115869)      |       |
| Quartile coefficient of dispersion                       | 0.31                          | 0.4                           |       |
| <b>P35527 (Keratin, type I cytoskeletal 9)</b>           |                               |                               | 0.531 |
| Min-Max                                                  | 70320 - 612280                | 92853 - 208514                |       |
| Mean                                                     | 177225                        | 145061                        |       |
| Median (Q1,Q3)                                           | 141456<br>(119723,<br>186353) | 140198<br>(105855,<br>174429) |       |
| Quartile coefficient of dispersion                       | 0.22                          | 0.24                          |       |
| <b>P51884 (Lumican)</b>                                  |                               |                               | 0.554 |
| Min-Max                                                  | 150578 -<br>746721            | 194322 -<br>327967            |       |
| Mean                                                     | 310637                        | 260317                        |       |

|                                                           |                               |                               |       |
|-----------------------------------------------------------|-------------------------------|-------------------------------|-------|
| Median (Q1,Q3)                                            | 276739<br>(235374,<br>329154) | 278608<br>(212465,<br>293968) |       |
| Quartile coefficient of dispersion                        | 0.17                          | 0.16                          |       |
| <b>P02741 (C-reactive protein)</b>                        |                               |                               | 0.554 |
| Min-Max                                                   | 35565 - 725464                | 41139 - 374919                |       |
| Mean                                                      | 112383                        | 103894                        |       |
| Median (Q1,Q3)                                            | 81903 (53008,<br>113377)      | 60307 (49618,<br>97617)       |       |
| Quartile coefficient of dispersion                        | 0.36                          | 0.33                          |       |
| <b>P00746 (Complement factor D)</b>                       |                               |                               | 0.554 |
| Min-Max                                                   | 8126 - 89555                  | 15305 - 75509                 |       |
| Mean                                                      | 31723                         | 36366                         |       |
| Median (Q1,Q3)                                            | 28004 (21611,<br>37895)       | 31582 (25295,<br>38887)       |       |
| Quartile coefficient of dispersion                        | 0.27                          | 0.21                          |       |
| <b>P35908 (Keratin, type II cytoskeletal 2 epidermal)</b> |                               |                               | 0.578 |
| Min-Max                                                   | 32913 - 169392                | 17669 - 113874                |       |
| Mean                                                      | 77569                         | 69947                         |       |
| Median (Q1,Q3)                                            | 64380 (51041,<br>102476)      | 77965 (31087,<br>103967)      |       |
| Quartile coefficient of dispersion                        | 0.34                          | 0.54                          |       |
| <b>P22792 (Carboxypeptidase N subunit 2)</b>              |                               |                               | 0.578 |
| Min-Max                                                   | 116183 -<br>585664            | 101435 -<br>258294            |       |
| Mean                                                      | 222314                        | 190005                        |       |
| Median (Q1,Q3)                                            | 195112<br>(161635,<br>246759) | 192193<br>(166026,<br>233352) |       |
| Quartile coefficient of dispersion                        | 0.21                          | 0.17                          |       |

|                                                       |                               |                               |       |
|-------------------------------------------------------|-------------------------------|-------------------------------|-------|
| <b>P00918 (Carbonic anhydrase 2)</b>                  |                               |                               | 0.578 |
| Min-Max                                               | 39841 - 287217                | 37794 - 137360                |       |
| Mean                                                  | 96484                         | 77858                         |       |
| Median (Q1,Q3)                                        | 78012 (58096,<br>110806)      | 76362 (57748,<br>93549)       |       |
| Quartile coefficient of dispersion                    | 0.31                          | 0.24                          |       |
| <b>Q13790 (Apolipoprotein F)</b>                      |                               |                               | 0.578 |
| Min-Max                                               | 12133 - 99367                 | 31645 - 79059                 |       |
| Mean                                                  | 42205                         | 43909                         |       |
| Median (Q1,Q3)                                        | 37362 (30152,<br>48538)       | 40431 (35068,<br>44148)       |       |
| Quartile coefficient of dispersion                    | 0.23                          | 0.11                          |       |
| <b>A0A0C4DH72 (Immunoglobulin kappa variable 1-6)</b> |                               |                               | 0.602 |
| Min-Max                                               | 431205 -<br>2759576           | 533757 -<br>1304517           |       |
| Mean                                                  | 864585                        | 778750                        |       |
| Median (Q1,Q3)                                        | 767208<br>(656595,<br>906804) | 785130<br>(587266,<br>836153) |       |
| Quartile coefficient of dispersion                    | 0.16                          | 0.17                          |       |
| <b>P06312 (Immunoglobulin kappa variable 4-1)</b>     |                               |                               | 0.602 |
| Min-Max                                               | 234885 -<br>1063203           | 448051 -<br>905751            |       |
| Mean                                                  | 665059                        | 631241                        |       |
| Median (Q1,Q3)                                        | 693344<br>(522766,<br>776118) | 656255<br>(460440,<br>719208) |       |
| Quartile coefficient of dispersion                    | 0.2                           | 0.22                          |       |
| <b>P01009 (Alpha-1-antitrypsin)</b>                   |                               |                               | 0.626 |
| Min-Max                                               | 9392159 -<br>24829680         | 9018343 -<br>20693821         |       |

|                                                                                        |                                     |                                     |       |
|----------------------------------------------------------------------------------------|-------------------------------------|-------------------------------------|-------|
| Mean                                                                                   | 15327428                            | 14587904                            |       |
| Median (Q1,Q3)                                                                         | 14250216<br>(12332346,<br>18526295) | 14539614<br>(11142141,<br>18266492) |       |
| Quartile coefficient of dispersion                                                     | 0.2                                 | 0.24                                |       |
| <b>P35858 (Insulin-like growth factor-binding protein complex acid labile subunit)</b> |                                     |                                     | 0.626 |
| Min-Max                                                                                | 74362 - 276671                      | 95596 - 219760                      |       |
| Mean                                                                                   | 142733                              | 134863                              |       |
| Median (Q1,Q3)                                                                         | 135630<br>(111806,<br>166392)       | 116058<br>(111420,<br>148244)       |       |
| Quartile coefficient of dispersion                                                     | 0.2                                 | 0.14                                |       |
| <b>P00738 (Haptoglobin)</b>                                                            |                                     |                                     | 0.651 |
| Min-Max                                                                                | 251846 -<br>34448537                | 7571100 -<br>20944367               |       |
| Mean                                                                                   | 16350081                            | 16349820                            |       |
| Median (Q1,Q3)                                                                         | 15315407<br>(12123849,<br>19959912) | 18720936<br>(13165966,<br>20568490) |       |
| Quartile coefficient of dispersion                                                     | 0.24                                | 0.22                                |       |
| <b>P02751 (Fibronectin)</b>                                                            |                                     |                                     | 0.651 |
| Min-Max                                                                                | 483182 -<br>1678461                 | 629758 -<br>1137123                 |       |
| Mean                                                                                   | 900931                              | 850336                              |       |
| Median (Q1,Q3)                                                                         | 838391<br>(691514,<br>1066375)      | 743294<br>(707449,<br>1069727)      |       |
| Quartile coefficient of dispersion                                                     | 0.21                                | 0.2                                 |       |
| <b>P00751 (Complement factor B)</b>                                                    |                                     |                                     | 0.651 |
| Min-Max                                                                                | 959773 -<br>2702958                 | 1193324 -<br>2675381                |       |
| Mean                                                                                   | 1600289                             | 1671997                             |       |

|                                                        |                                  |                                  |       |
|--------------------------------------------------------|----------------------------------|----------------------------------|-------|
| Median (Q1,Q3)                                         | 1424671<br>(1342659,<br>1838239) | 1584788<br>(1356698,<br>1773308) |       |
| Quartile coefficient of dispersion                     | 0.16                             | 0.13                             |       |
| <b>P06727 (Apolipoprotein A-IV)</b>                    |                                  |                                  | 0.651 |
| Min-Max                                                | 615899 -<br>5865244              | 1112026 -<br>5385869             |       |
| Mean                                                   | 2617391                          | 2564683                          |       |
| Median (Q1,Q3)                                         | 2398189<br>(1738784,<br>3366817) | 2157578<br>(1340581,<br>3330124) |       |
| Quartile coefficient of dispersion                     | 0.32                             | 0.43                             |       |
| <b>P36955 (Pigment epithelium-derived factor)</b>      |                                  |                                  | 0.651 |
| Min-Max                                                | 197511 -<br>538400               | 254191 -<br>518685               |       |
| Mean                                                   | 356939                           | 341629                           |       |
| Median (Q1,Q3)                                         | 346881<br>(290393,<br>430661)    | 315234<br>(282909,<br>376958)    |       |
| Quartile coefficient of dispersion                     | 0.19                             | 0.14                             |       |
| <b>P02745 (Complement C1q subcomponent subunit A)</b>  |                                  |                                  | 0.651 |
| Min-Max                                                | 247170 -<br>975199               | 225548 -<br>488919               |       |
| Mean                                                   | 426151                           | 383270                           |       |
| Median (Q1,Q3)                                         | 375360<br>(315514,<br>481227)    | 413687<br>(284669,<br>483515)    |       |
| Quartile coefficient of dispersion                     | 0.21                             | 0.26                             |       |
| <b>A0A0B4J1V0 (Immunoglobulin heavy variable 3-15)</b> |                                  |                                  | 0.651 |
| Min-Max                                                | 238271 -<br>3370212              | 510358 -<br>1374789              |       |
| Mean                                                   | 874114                           | 816700                           |       |

|                                                        |                               |                               |       |
|--------------------------------------------------------|-------------------------------|-------------------------------|-------|
| Median (Q1,Q3)                                         | 838856<br>(680627,<br>996876) | 800867<br>(689991,<br>869121) |       |
| Quartile coefficient of dispersion                     | 0.19                          | 0.11                          |       |
| <b>P0DOY3 (Immunoglobulin lambda constant 3)</b>       |                               |                               | 0.651 |
| Min-Max                                                | 69289 - 310002                | 74840 - 299792                |       |
| Mean                                                   | 143293                        | 148587                        |       |
| Median (Q1,Q3)                                         | 144249<br>(109857,<br>159187) | 116186 (81954,<br>201395)     |       |
| Quartile coefficient of dispersion                     | 0.18                          | 0.42                          |       |
| <b>P26927 (Hepatocyte growth factor-like protein)</b>  |                               |                               | 0.651 |
| Min-Max                                                | 8673 - 32827                  | 9671 - 29006                  |       |
| Mean                                                   | 19155                         | 17676                         |       |
| Median (Q1,Q3)                                         | 18565 (14079,<br>23677)       | 17642 (13922,<br>20496)       |       |
| Quartile coefficient of dispersion                     | 0.25                          | 0.19                          |       |
| <b>P06396 (Gelsolin)</b>                               |                               |                               | 0.676 |
| Min-Max                                                | 255360 -<br>1012415           | 396582 -<br>836519            |       |
| Mean                                                   | 537347                        | 553675                        |       |
| Median (Q1,Q3)                                         | 473893<br>(403805,<br>628710) | 454954<br>(433818,<br>693133) |       |
| Quartile coefficient of dispersion                     | 0.22                          | 0.23                          |       |
| <b>Q9UK55 (Protein Z-dependent protease inhibitor)</b> |                               |                               | 0.676 |
| Min-Max                                                | 37696 - 192842                | 28664 - 110169                |       |
| Mean                                                   | 70026                         | 61936                         |       |
| Median (Q1,Q3)                                         | 65737 (54001,<br>76626)       | 65252 (37600,<br>77051)       |       |

|                                                     |                           |                           |       |
|-----------------------------------------------------|---------------------------|---------------------------|-------|
| Quartile coefficient of dispersion                  | 0.17                      | 0.34                      |       |
| <b>P01721 (Immunoglobulin lambda variable 6-57)</b> |                           |                           | 0.676 |
| Min-Max                                             | 21900 - 177063            | 26381 - 95129             |       |
| Mean                                                | 56637                     | 57998                     |       |
| Median (Q1,Q3)                                      | 50402 (38301, 69893)      | 59050 (38757, 69870)      |       |
| Quartile coefficient of dispersion                  | 0.29                      | 0.29                      |       |
| <b>P02655 (Apolipoprotein C-II)</b>                 |                           |                           | 0.676 |
| Min-Max                                             | 285454 - 2779389          | 439282 - 2612294          |       |
| Mean                                                | 1233554                   | 1358975                   |       |
| Median (Q1,Q3)                                      | 1220672 (832580, 1545976) | 1318040 (776211, 1915575) |       |
| Quartile coefficient of dispersion                  | 0.3                       | 0.42                      |       |
| <b>P07360 (Complement component C8 gamma chain)</b> |                           |                           | 0.676 |
| Min-Max                                             | 71604 - 194387            | 88949 - 176176            |       |
| Mean                                                | 128296                    | 121937                    |       |
| Median (Q1,Q3)                                      | 124165 (97681, 153105)    | 122447 (92327, 135582)    |       |
| Quartile coefficient of dispersion                  | 0.22                      | 0.19                      |       |
| <b>P60709 (Actin, cytoplasmic 1)</b>                |                           |                           | 0.702 |
| Min-Max                                             | 48263 - 599223            | 63952 - 167304            |       |
| Mean                                                | 127459                    | 103533                    |       |
| Median (Q1,Q3)                                      | 102339 (76794, 132788)    | 101029 (75637, 115115)    |       |
| Quartile coefficient of dispersion                  | 0.27                      | 0.21                      |       |
| <b>P02750 (Leucine-rich alpha-2-glycoprotein)</b>   |                           |                           | 0.728 |
| Min-Max                                             | 420416 - 2077668          | 513369 - 1524715          |       |

|                                                     |                                |                                |       |
|-----------------------------------------------------|--------------------------------|--------------------------------|-------|
| Mean                                                | 921346                         | 906435                         |       |
| Median (Q1,Q3)                                      | 769216<br>(622024,<br>1036003) | 895542<br>(674799,<br>1001048) |       |
| Quartile coefficient of dispersion                  | 0.25                           | 0.19                           |       |
| <b>P23142 (Fibulin-1)</b>                           |                                |                                | 0.728 |
| Min-Max                                             | 13662 - 146477                 | 30077 - 77290                  |       |
| Mean                                                | 54100                          | 48261                          |       |
| Median (Q1,Q3)                                      | 47121 (35606,<br>62920)        | 44779 (37215,<br>58466)        |       |
| Quartile coefficient of dispersion                  | 0.28                           | 0.22                           |       |
| <b>Q9UGM5 (Fetuin-B)</b>                            |                                |                                | 0.728 |
| Min-Max                                             | 16848 - 179853                 | 17713 - 42487                  |       |
| Mean                                                | 32010                          | 28690                          |       |
| Median (Q1,Q3)                                      | 26212 (19320,<br>31940)        | 26365 (21536,<br>34213)        |       |
| Quartile coefficient of dispersion                  | 0.25                           | 0.23                           |       |
| <b>P00739 (Haptoglobin-related protein)</b>         |                                |                                | 0.728 |
| Min-Max                                             | 56516 - 342428                 | 39598 - 210429                 |       |
| Mean                                                | 142538                         | 124050                         |       |
| Median (Q1,Q3)                                      | 114205 (90902,<br>159989)      | 118435 (83866,<br>172409)      |       |
| Quartile coefficient of dispersion                  | 0.28                           | 0.35                           |       |
| <b>P01700 (Immunoglobulin lambda variable 1-47)</b> |                                |                                | 0.728 |
| Min-Max                                             | 471410 -<br>1569918            | 552931 -<br>1834309            |       |
| Mean                                                | 930885                         | 910702                         |       |
| Median (Q1,Q3)                                      | 976471<br>(657377,<br>1107408) | 741269<br>(668070,<br>974020)  |       |
| Quartile coefficient of dispersion                  | 0.26                           | 0.19                           |       |



|                                                     |                            |                            |       |
|-----------------------------------------------------|----------------------------|----------------------------|-------|
| <b>P00488 (Coagulation factor XIII A chain)</b>     |                            |                            | 0.754 |
| Min-Max                                             | 40803 - 298684             | 37953 - 133492             |       |
| Mean                                                | 84991                      | 83041                      |       |
| Median (Q1,Q3)                                      | 72932 (58805, 90430)       | 75954 (61293, 101490)      |       |
| Quartile coefficient of dispersion                  | 0.21                       | 0.25                       |       |
| <b>P02656 (Apolipoprotein C-III)</b>                |                            |                            | 0.754 |
| Min-Max                                             | 956353 - 6179759           | 1202004 - 4729731          |       |
| Mean                                                | 3181629                    | 2921688                    |       |
| Median (Q1,Q3)                                      | 2994964 (2148835, 3891842) | 2983209 (2016305, 3842254) |       |
| Quartile coefficient of dispersion                  | 0.29                       | 0.31                       |       |
| <b>P01591 (Immunoglobulin J chain)</b>              |                            |                            | 0.754 |
| Min-Max                                             | 93924 - 555336             | 129424 - 448884            |       |
| Mean                                                | 291192                     | 300076                     |       |
| Median (Q1,Q3)                                      | 274798 (223424, 355471)    | 319557 (198203, 392958)    |       |
| Quartile coefficient of dispersion                  | 0.23                       | 0.33                       |       |
| <b>P06276 (Cholinesterase)</b>                      |                            |                            | 0.754 |
| Min-Max                                             | 26394 - 1465373            | 51882 - 109425             |       |
| Mean                                                | 120524                     | 78616                      |       |
| Median (Q1,Q3)                                      | 72349 (60048, 84934)       | 75290 (58054, 102038)      |       |
| Quartile coefficient of dispersion                  | 0.17                       | 0.27                       |       |
| <b>P80748 (Immunoglobulin lambda variable 3-21)</b> |                            |                            | 0.754 |
| Min-Max                                             | 44147 - 969193             | 137566 - 416147            |       |

|                                                 |                                  |                                  |       |
|-------------------------------------------------|----------------------------------|----------------------------------|-------|
| Mean                                            | 233640                           | 226208                           |       |
| Median (Q1,Q3)                                  | 191488<br>(146627,<br>256285)    | 190221<br>(150703,<br>280672)    |       |
| Quartile coefficient of dispersion              | 0.27                             | 0.3                              |       |
| <b>P49908 (Selenoprotein P)</b>                 |                                  |                                  | 0.754 |
| Min-Max                                         | 38237 - 436871                   | 50346 - 122306                   |       |
| Mean                                            | 97392                            | 76655                            |       |
| Median (Q1,Q3)                                  | 65358 (56500,<br>89581)          | 73533 (62816,<br>80624)          |       |
| Quartile coefficient of dispersion              | 0.23                             | 0.12                             |       |
| <b>P04264 (Keratin, type II cytoskeletal 1)</b> |                                  |                                  | 0.781 |
| Min-Max                                         | 76464 -<br>1002325               | 105372 -<br>685795               |       |
| Mean                                            | 261695                           | 255455                           |       |
| Median (Q1,Q3)                                  | 161526<br>(117155,<br>281222)    | 148322<br>(127482,<br>340751)    |       |
| Quartile coefficient of dispersion              | 0.41                             | 0.46                             |       |
| <b>P02765 (Alpha-2-HS-glycoprotein)</b>         |                                  |                                  | 0.781 |
| Min-Max                                         | 578746 -<br>2121694              | 904277 -<br>2048533              |       |
| Mean                                            | 1305286                          | 1382553                          |       |
| Median (Q1,Q3)                                  | 1330048<br>(1049540,<br>1608700) | 1356625<br>(1213288,<br>1474478) |       |
| Quartile coefficient of dispersion              | 0.21                             | 0.1                              |       |
| <b>P02763 (Alpha-1-acid glycoprotein 1)</b>     |                                  |                                  | 0.781 |
| Min-Max                                         | 1415079 -<br>14363021            | 3278150 -<br>7905878             |       |
| Mean                                            | 5463867                          | 4921074                          |       |

|                                                      |                                  |                                  |       |
|------------------------------------------------------|----------------------------------|----------------------------------|-------|
| Median (Q1,Q3)                                       | 5004828<br>(3304322,<br>7638226) | 4797866<br>(3774699,<br>5475665) |       |
| Quartile coefficient of dispersion                   | 0.4                              | 0.18                             |       |
| <b>P00734 (Prothrombin)</b>                          |                                  |                                  | 0.781 |
| Min-Max                                              | 628951 -<br>1616387              | 706433 -<br>1225261              |       |
| Mean                                                 | 911094                           | 924178                           |       |
| Median (Q1,Q3)                                       | 879807<br>(786299,<br>982053)    | 897439<br>(750928,<br>1050668)   |       |
| Quartile coefficient of dispersion                   | 0.11                             | 0.17                             |       |
| <b>P27169 (Serum<br/>paraoxonase/arylesterase 1)</b> |                                  |                                  | 0.781 |
| Min-Max                                              | 122639 -<br>1358495              | 220147 -<br>796130               |       |
| Mean                                                 | 597922                           | 529421                           |       |
| Median (Q1,Q3)                                       | 592470<br>(417405,<br>739776)    | 624099<br>(350295,<br>671850)    |       |
| Quartile coefficient of dispersion                   | 0.28                             | 0.31                             |       |
| <b>P02753 (Retinol-binding protein 4)</b>            |                                  |                                  | 0.781 |
| Min-Max                                              | 359920 -<br>1244208              | 525286 -<br>1107685              |       |
| Mean                                                 | 793609                           | 825009                           |       |
| Median (Q1,Q3)                                       | 782139<br>(621801,<br>955093)    | 768382<br>(675525,<br>1017734)   |       |
| Quartile coefficient of dispersion                   | 0.21                             | 0.2                              |       |
| <b>P55058 (Phospholipid transfer<br/>protein)</b>    |                                  |                                  | 0.781 |
| Min-Max                                              | 5892 - 190083                    | 11540 - 28787                    |       |
| Mean                                                 | 29716                            | 19356                            |       |
| Median (Q1,Q3)                                       | 19816 (15376,<br>25923)          | 19379 (15901,<br>21568)          |       |

|                                                       |                         |                         |       |
|-------------------------------------------------------|-------------------------|-------------------------|-------|
| Quartile coefficient of dispersion                    | 0.26                    | 0.15                    |       |
| <b>Q04756 (Hepatocyte growth factor activator)</b>    |                         |                         | 0.781 |
| Min-Max                                               | 47498 - 230276          | 49760 - 127751          |       |
| Mean                                                  | 98031                   | 88052                   |       |
| Median (Q1,Q3)                                        | 84197 (74655, 115162)   | 90637 (72531, 98433)    |       |
| Quartile coefficient of dispersion                    | 0.21                    | 0.15                    |       |
| <b>PODJI9 (Serum amyloid A-2 protein)</b>             |                         |                         | 0.781 |
| Min-Max                                               | 10384 - 543615          | 25842 - 128217          |       |
| Mean                                                  | 90602                   | 58584                   |       |
| Median (Q1,Q3)                                        | 62830 (29901, 83368)    | 53451 (34426, 66798)    |       |
| Quartile coefficient of dispersion                    | 0.47                    | 0.32                    |       |
| <b>Q15848 (Adiponectin)</b>                           |                         |                         | 0.808 |
| Min-Max                                               | 19906 - 268709          | 29736 - 109999          |       |
| Mean                                                  | 68666                   | 57395                   |       |
| Median (Q1,Q3)                                        | 53049 (43200, 73049)    | 55653 (38213, 65060)    |       |
| Quartile coefficient of dispersion                    | 0.26                    | 0.26                    |       |
| <b>P22352 (Glutathione peroxidase 3)</b>              |                         |                         | 0.808 |
| Min-Max                                               | 44875 - 472518          | 44001 - 350749          |       |
| Mean                                                  | 187219                  | 168882                  |       |
| Median (Q1,Q3)                                        | 155151 (101448, 248373) | 159041 (100751, 202804) |       |
| Quartile coefficient of dispersion                    | 0.42                    | 0.34                    |       |
| <b>P01857 (Immunoglobulin heavy constant gamma 1)</b> |                         |                         | 0.835 |
| Min-Max                                               | 7313244 - 18963559      | 7022801 - 16755579      |       |

|                                                                      |                                     |                                     |       |
|----------------------------------------------------------------------|-------------------------------------|-------------------------------------|-------|
| Mean                                                                 | 12504392                            | 12490500                            |       |
| Median (Q1,Q3)                                                       | 12595150<br>(10380086,<br>14099032) | 13172880<br>(10227547,<br>15389991) |       |
| Quartile coefficient of dispersion                                   | 0.15                                | 0.2                                 |       |
| <b>P01619 (Immunoglobulin kappa variable 3-20)</b>                   |                                     |                                     | 0.835 |
| Min-Max                                                              | 806312 -<br>8712502                 | 1777939 -<br>4792670                |       |
| Mean                                                                 | 2936996                             | 2992028                             |       |
| Median (Q1,Q3)                                                       | 2961318<br>(2231497,<br>3480047)    | 2800204<br>(2229156,<br>3645730)    |       |
| Quartile coefficient of dispersion                                   | 0.22                                | 0.24                                |       |
| <b>P80108 (Phosphatidylinositol-glycan-specific phospholipase D)</b> |                                     |                                     | 0.835 |
| Min-Max                                                              | 58961 - 555024                      | 60888 - 213929                      |       |
| Mean                                                                 | 120751                              | 113906                              |       |
| Median (Q1,Q3)                                                       | 94988 (77940,<br>131195)            | 98592 (87693,<br>131476)            |       |
| Quartile coefficient of dispersion                                   | 0.25                                | 0.2                                 |       |
| <b>A0A075B6K4 (Immunoglobulin lambda variable 3-10)</b>              |                                     |                                     | 0.835 |
| Min-Max                                                              | 8397 - 67450                        | 8121 - 29645                        |       |
| Mean                                                                 | 25046                               | 20557                               |       |
| Median (Q1,Q3)                                                       | 19877 (15158,<br>27077)             | 21419 (14709,<br>27290)             |       |
| Quartile coefficient of dispersion                                   | 0.28                                | 0.3                                 |       |
| <b>P01764 (Immunoglobulin heavy variable 3-23)</b>                   |                                     |                                     | 0.835 |
| Min-Max                                                              | 17615 - 659115                      | 28792 - 359774                      |       |
| Mean                                                                 | 267600                              | 228219                              |       |

|                                                         |                                |                                |       |
|---------------------------------------------------------|--------------------------------|--------------------------------|-------|
| Median (Q1,Q3)                                          | 233369 (86377,<br>377713)      | 252240<br>(164442,<br>318502)  |       |
| Quartile coefficient of dispersion                      | 0.63                           | 0.32                           |       |
| <b>P04196 (Histidine-rich glycoprotein)</b>             |                                |                                | 0.862 |
| Min-Max                                                 | 491991 -<br>2013277            | 352235 -<br>1292273            |       |
| Mean                                                    | 921604                         | 863062                         |       |
| Median (Q1,Q3)                                          | 814400<br>(725829,<br>1019125) | 957812<br>(657050,<br>1009215) |       |
| Quartile coefficient of dispersion                      | 0.17                           | 0.21                           |       |
| <b>P06331 (Immunoglobulin heavy<br/>variable 4-34)</b>  |                                |                                | 0.862 |
| Min-Max                                                 | 6555 - 510978                  | 16895 - 246278                 |       |
| Mean                                                    | 156453                         | 136466                         |       |
| Median (Q1,Q3)                                          | 131822 (88430,<br>211248)      | 138343 (94864,<br>178912)      |       |
| Quartile coefficient of dispersion                      | 0.41                           | 0.31                           |       |
| <b>P01714 (Immunoglobulin lambda<br/>variable 3-19)</b> |                                |                                | 0.862 |
| Min-Max                                                 | 12742 - 252877                 | 53595 - 419243                 |       |
| Mean                                                    | 111073                         | 141844                         |       |
| Median (Q1,Q3)                                          | 108729 (79383,<br>126045)      | 107986 (92792,<br>131619)      |       |
| Quartile coefficient of dispersion                      | 0.23                           | 0.17                           |       |
| <b>P07996 (Thrombospondin-1)</b>                        |                                |                                | 0.889 |
| Min-Max                                                 | 30262 - 249894                 | 79948 - 196782                 |       |
| Mean                                                    | 113320                         | 112091                         |       |
| Median (Q1,Q3)                                          | 100735 (63669,<br>160347)      | 94393 (85361,<br>126999)       |       |
| Quartile coefficient of dispersion                      | 0.43                           | 0.2                            |       |

|                                                        |                           |                          |       |
|--------------------------------------------------------|---------------------------|--------------------------|-------|
| <b>P04278 (Sex hormone-binding globulin)</b>           |                           |                          | 0.889 |
| Min-Max                                                | 12801 - 66885             | 12983 - 54316            |       |
| Mean                                                   | 37849                     | 35606                    |       |
| Median (Q1,Q3)                                         | 38686 (29614, 44860)      | 38755 (31487, 43729)     |       |
| Quartile coefficient of dispersion                     | 0.2                       | 0.16                     |       |
| <b>A0A0A0MS15 (Immunoglobulin heavy variable 3-49)</b> |                           |                          | 0.889 |
| Min-Max                                                | 99354 - 611472            | 162607 - 303473          |       |
| Mean                                                   | 289689                    | 239816                   |       |
| Median (Q1,Q3)                                         | 221906 (178489, 377616)   | 240134 (204156, 285233)  |       |
| Quartile coefficient of dispersion                     | 0.36                      | 0.17                     |       |
| <b>P81605 (Dermcidin)</b>                              |                           |                          | 0.889 |
| Min-Max                                                | 5634 - 43358              | 9292 - 43612             |       |
| Mean                                                   | 20913                     | 20822                    |       |
| Median (Q1,Q3)                                         | 17365 (10946, 29406)      | 15759 (12076, 25406)     |       |
| Quartile coefficient of dispersion                     | 0.46                      | 0.36                     |       |
| <b>P04114 (Apolipoprotein B-100)</b>                   |                           |                          | 0.917 |
| Min-Max                                                | 486693 - 1819352          | 494705 - 3090469         |       |
| Mean                                                   | 1046720                   | 1219914                  |       |
| Median (Q1,Q3)                                         | 1025301 (772255, 1299153) | 979333 (946719, 1085279) |       |
| Quartile coefficient of dispersion                     | 0.25                      | 0.07                     |       |
| <b>P04040 (Catalase)</b>                               |                           |                          | 0.917 |
| Min-Max                                                | 30947 - 527917            | 34491 - 192571           |       |

|                                          |                                   |                                   |       |
|------------------------------------------|-----------------------------------|-----------------------------------|-------|
| Mean                                     | 103807                            | 94071                             |       |
| Median (Q1,Q3)                           | 76992 (63048,<br>117358)          | 90120 (64124,<br>108043)          |       |
| Quartile coefficient of dispersion       | 0.3                               | 0.26                              |       |
| <b>P12259 (Coagulation factor V)</b>     |                                   |                                   | 0.917 |
| Min-Max                                  | 38963 -<br>1434382                | 87282 - 428787                    |       |
| Mean                                     | 277851                            | 225056                            |       |
| Median (Q1,Q3)                           | 213200<br>(126319,<br>340897)     | 212251<br>(153941,<br>255766)     |       |
| Quartile coefficient of dispersion       | 0.46                              | 0.25                              |       |
| <b>P30043 (Flavin reductase (NADPH))</b> |                                   |                                   | 0.917 |
| Min-Max                                  | 13615 - 151523                    | 21985 - 70623                     |       |
| Mean                                     | 47418                             | 46106                             |       |
| Median (Q1,Q3)                           | 44956 (34686,<br>56619)           | 42820 (29335,<br>63955)           |       |
| Quartile coefficient of dispersion       | 0.24                              | 0.37                              |       |
| <b>P01023 (Alpha-2-macroglobulin)</b>    |                                   |                                   | 0.945 |
| Min-Max                                  | 5663897 -<br>17389061             | 6091885 -<br>19034948             |       |
| Mean                                     | 10540923                          | 11077769                          |       |
| Median (Q1,Q3)                           | 9573324<br>(8237088,<br>13281785) | 9391288<br>(8861799,<br>11770539) |       |
| Quartile coefficient of dispersion       | 0.23                              | 0.14                              |       |
| <b>O14791 (Apolipoprotein L1)</b>        |                                   |                                   | 0.945 |
| Min-Max                                  | 145067 -<br>837572                | 153588 -<br>932194                |       |
| Mean                                     | 356526                            | 382677                            |       |
| Median (Q1,Q3)                           | 313717<br>(249291,<br>435386)     | 327557<br>(248664,<br>405691)     |       |



|                                          |                          |                           |       |
|------------------------------------------|--------------------------|---------------------------|-------|
| Quartile coefficient of dispersion       | 0.27                     | 0.24                      |       |
| <b>O75882 (Attractin)</b>                |                          |                           | 0.945 |
| Min-Max                                  | 56336 - 294168           | 59593 - 281150            |       |
| Mean                                     | 111878                   | 119459                    |       |
| Median (Q1,Q3)                           | 91775 (78925,<br>124044) | 100489 (73227,<br>126127) |       |
| Quartile coefficient of dispersion       | 0.22                     | 0.27                      |       |
| <b>P06702 (Protein S100-A9)</b>          |                          |                           | 0.945 |
| Min-Max                                  | 4204 - 154075            | 7411 - 60053              |       |
| Mean                                     | 22510                    | 22662                     |       |
| Median (Q1,Q3)                           | 15284 (12662,<br>23403)  | 14670 (12176,<br>29462)   |       |
| Quartile coefficient of dispersion       | 0.3                      | 0.42                      |       |
| <b>P61769 (Beta-2-microglobulin)</b>     |                          |                           | 0.972 |
| Min-Max                                  | 12971 - 111447           | 17460 - 65665             |       |
| Mean                                     | 32892                    | 33439                     |       |
| Median (Q1,Q3)                           | 28787 (22950,<br>38566)  | 29229 (24020,<br>36669)   |       |
| Quartile coefficient of dispersion       | 0.25                     | 0.21                      |       |
| <b>P03951 (Coagulation factor XI)</b>    |                          |                           | 0.972 |
| Min-Max                                  | 29418 - 705129           | 31079 - 167666            |       |
| Mean                                     | 103260                   | 72717                     |       |
| Median (Q1,Q3)                           | 52965 (44032,<br>90926)  | 51921 (45683,<br>88069)   |       |
| Quartile coefficient of dispersion       | 0.35                     | 0.32                      |       |
| <b>Q96KN2 (Beta-Ala-His dipeptidase)</b> |                          |                           | 0.972 |
| Min-Max                                  | 12607 - 76921            | 14798 - 44111             |       |
| Mean                                     | 35469                    | 31653                     |       |

|                                                        |                               |                               |       |
|--------------------------------------------------------|-------------------------------|-------------------------------|-------|
| Median (Q1,Q3)                                         | 29801 (23123,<br>41642)       | 30656 (25411,<br>41937)       |       |
| Quartile coefficient of dispersion                     | 0.29                          | 0.25                          |       |
| <b>P02747 (Complement C1q subcomponent subunit C)</b>  |                               |                               | 0.972 |
| Min-Max                                                | 278887 -<br>1144412           | 421353 -<br>856772            |       |
| Mean                                                   | 637509                        | 627523                        |       |
| Median (Q1,Q3)                                         | 628843<br>(502243,<br>748852) | 640932<br>(524764,<br>711725) |       |
| Quartile coefficient of dispersion                     | 0.2                           | 0.15                          |       |
| <b>O43866 (CD5 antigen-like)</b>                       |                               |                               | 0.972 |
| Min-Max                                                | 3891 - 327793                 | 5835 - 240375                 |       |
| Mean                                                   | 131415                        | 127650                        |       |
| Median (Q1,Q3)                                         | 137103 (45546,<br>197748)     | 114197 (73665,<br>193019)     |       |
| Quartile coefficient of dispersion                     | 0.63                          | 0.45                          |       |
| <b>A0A0C4DH38 (Immunoglobulin heavy variable 5-51)</b> |                               |                               | 0.999 |
| Min-Max                                                | 26795 - 214408                | 36688 - 640544                |       |
| Mean                                                   | 89096                         | 142705                        |       |
| Median (Q1,Q3)                                         | 74482 (58817,<br>113795)      | 82356 (65343,<br>93156)       |       |
| Quartile coefficient of dispersion                     | 0.32                          | 0.18                          |       |
| <b>Q92954 (Proteoglycan 4)</b>                         |                               |                               | 0.999 |
| Min-Max                                                | 7366 - 84147                  | 9463 - 54777                  |       |
| Mean                                                   | 29802                         | 28486                         |       |
| Median (Q1,Q3)                                         | 26892 (15145,<br>40513)       | 25885 (15427,<br>39307)       |       |
| Quartile coefficient of dispersion                     | 0.46                          | 0.44                          |       |

Q1 – the first quartile; Q3 – the third quartile; Mann-Whitney U test was applied for comparison of the quantitative data; p-value equal or less than 0.05 was considered statistically significant.
