# Supplementary material for: SWATH-MS for prospective identification of protein blood biomarkers of rtPA-associated intracranial hemorrhage in acute ischemic stroke: a pilot study
Source: PubMed Central journal article supplement (PMC8455557; doi:10.1038/s41598-021-97710-9), 2021-09-21
Supplement: 41598_2021_97710_MOESM4_ESM.pdf [file 41598_2021_97710_MOESM4_ESM.pdf]

***SWATH- MS for prospective identification of protein blood biomarkers of rtPA-associated intracranial hemorrhage in acute ischemic stroke: a pilot study***

*Bartosz Karaszewski, Anna Gójska-Grymajło, Paulina Czaplewska, Bartosz Jabłoński, Aleksandra E. Lewandowska, Daria Ossowska, Adam Wyszomirski, Marek Hałas, Edyta Szurowska*

***Supplementary Table 2b. Differences in distributions of plasma proteins in patients with and without intracranial hemorrhage (ICH).***

|                                              | Without ICH<br>(N=32)            | With ICH (N=9)                    | p<br>value |
|----------------------------------------------|----------------------------------|-----------------------------------|------------|
| <b>P04278 (Sex hormone-binding globulin)</b> |                                  |                                   | 0.006      |
| Min-Max                                      | 12364 - 77648                    | 18890 - 137661                    |            |
| Mean                                         | 32032                            | 53615                             |            |
| Median (Q1,Q3)                               | 30979 (22554,<br>37261)          | 45947 (41476,<br>53836)           |            |
| Quartile coefficient of dispersion           | 0.25                             | 0.13                              |            |
| <b>P02675 (Fibrinogen beta chain)</b>        |                                  |                                   | 0.017      |
| Min-Max                                      | 2599929 -<br>11512151            | 6803847 -<br>11978411             |            |
| Mean                                         | 7098058                          | 9219731                           |            |
| Median (Q1,Q3)                               | 6691786<br>(5408873,<br>8878122) | 9216882<br>(7608785,<br>10068706) |            |
| Quartile coefficient of dispersion           | 0.24                             | 0.14                              |            |
| <b>P02679 (Fibrinogen gamma chain)</b>       |                                  |                                   | 0.021      |
| Min-Max                                      | 4350465 -<br>15639932            | 9128520 -<br>14989155             |            |
| Mean                                         | 9465736                          | 11716563                          |            |

|                                                              |                                   |                                     |       |
|--------------------------------------------------------------|-----------------------------------|-------------------------------------|-------|
| Median (Q1,Q3)                                               | 9320935<br>(7574401,<br>11193242) | 11465208<br>(10539057,<br>12945970) |       |
| Quartile coefficient of dispersion                           | 0.19                              | 0.1                                 |       |
| <b>A0A0C4DH38 (Immunoglobulin heavy variable 5-51)</b>       |                                   |                                     | 0.021 |
| Min-Max                                                      | 26560 - 212136                    | 52023 - 778336                      |       |
| Mean                                                         | 77448                             | 169783                              |       |
| Median (Q1,Q3)                                               | 58405 (49917,<br>78686)           | 103877 (85690,<br>121555)           |       |
| Quartile coefficient of dispersion                           | 0.22                              | 0.17                                |       |
| <b>Q06033 (Inter-alpha-trypsin inhibitor heavy chain H3)</b> |                                   |                                     | 0.025 |
| Min-Max                                                      | 86754 - 892388                    | 208651 -<br>2060956                 |       |
| Mean                                                         | 245673                            | 480053                              |       |
| Median (Q1,Q3)                                               | 227784<br>(145420,<br>291568)     | 276340<br>(257465,<br>318183)       |       |
| Quartile coefficient of dispersion                           | 0.33                              | 0.11                                |       |
| <b>P02649 (Apolipoprotein E)</b>                             |                                   |                                     | 0.027 |
| Min-Max                                                      | 457437 -<br>1368153               | 431688 -<br>2074547                 |       |
| Mean                                                         | 819091                            | 1233080                             |       |
| Median (Q1,Q3)                                               | 784002<br>(679415,<br>981123)     | 1200818<br>(879202,<br>1547952)     |       |
| Quartile coefficient of dispersion                           | 0.18                              | 0.28                                |       |
| <b>P36955 (Pigment epithelium-derived factor)</b>            |                                   |                                     | 0.038 |
| Min-Max                                                      | 139699 -<br>612807                | 311481 -<br>853268                  |       |
| Mean                                                         | 339511                            | 441325                              |       |

|                                                          |                                     |                                     |       |
|----------------------------------------------------------|-------------------------------------|-------------------------------------|-------|
| Median (Q1,Q3)                                           | 321511<br>(262356,<br>403623)       | 408218<br>(366367,<br>444596)       |       |
| Quartile coefficient of dispersion                       | 0.21                                | 0.1                                 |       |
| <b>Q9NZP8 (Complement C1r subcomponent-like protein)</b> |                                     |                                     | 0.055 |
| Min-Max                                                  | 26004 - 198813                      | 33534 - 776229                      |       |
| Mean                                                     | 61450                               | 125334                              |       |
| Median (Q1,Q3)                                           | 56692 (46496,<br>65742)             | 44469 (39543,<br>52033)             |       |
| Quartile coefficient of dispersion                       | 0.17                                | 0.14                                |       |
| <b>P81605 (Dermcidin)</b>                                |                                     |                                     | 0.055 |
| Min-Max                                                  | 6708 - 90765                        | 2224 - 92640                        |       |
| Mean                                                     | 22474                               | 36337                               |       |
| Median (Q1,Q3)                                           | 14264 (11281,<br>28442)             | 33314 (19872,<br>48967)             |       |
| Quartile coefficient of dispersion                       | 0.43                                | 0.42                                |       |
| <b>P07357 (Complement component C8 alpha chain)</b>      |                                     |                                     | 0.063 |
| Min-Max                                                  | 107833 -<br>574584                  | 176432 -<br>419414                  |       |
| Mean                                                     | 205794                              | 248570                              |       |
| Median (Q1,Q3)                                           | 194679<br>(169829,<br>222385)       | 220043<br>(203270,<br>239994)       |       |
| Quartile coefficient of dispersion                       | 0.13                                | 0.08                                |       |
| <b>P02787 (Serotransferrin)</b>                          |                                     |                                     | 0.068 |
| Min-Max                                                  | 8109647 -<br>23932972               | 9788805 -<br>17668437               |       |
| Mean                                                     | 15794667                            | 13285485                            |       |
| Median (Q1,Q3)                                           | 15972430<br>(13265739,<br>18447993) | 12904036<br>(10703028,<br>15435826) |       |

|                                                                       |                                 |                                  |       |
|-----------------------------------------------------------------------|---------------------------------|----------------------------------|-------|
| Quartile coefficient of dispersion                                    | 0.16                            | 0.18                             |       |
| <b>P00742 (Coagulation factor X)</b>                                  |                                 |                                  | 0.068 |
| Min-Max                                                               | 39427 - 141053                  | 42625 - 224602                   |       |
| Mean                                                                  | 72850                           | 71128                            |       |
| Median (Q1,Q3)                                                        | 65385 (53521,<br>85184)         | 46212 (45875,<br>61769)          |       |
| Quartile coefficient of dispersion                                    | 0.23                            | 0.15                             |       |
| <b>Q15582 (Transforming growth factor-beta-induced protein ig-h3)</b> |                                 |                                  | 0.073 |
| Min-Max                                                               | 6881 - 42951                    | 16490 - 86108                    |       |
| Mean                                                                  | 21358                           | 33381                            |       |
| Median (Q1,Q3)                                                        | 19517 (13756,<br>28008)         | 28061 (17865,<br>34368)          |       |
| Quartile coefficient of dispersion                                    | 0.34                            | 0.32                             |       |
| <b>P02765 (Alpha-2-HS-glycoprotein)</b>                               |                                 |                                  | 0.078 |
| Min-Max                                                               | 431299 -<br>1771046             | 1125631 -<br>1695680             |       |
| Mean                                                                  | 1088063                         | 1346267                          |       |
| Median (Q1,Q3)                                                        | 1103596<br>(758902,<br>1356179) | 1336773<br>(1127384,<br>1394154) |       |
| Quartile coefficient of dispersion                                    | 0.28                            | 0.11                             |       |
| <b>P10643 (Complement component C7)</b>                               |                                 |                                  | 0.083 |
| Min-Max                                                               | 71884 - 663613                  | 175750 -<br>769549               |       |
| Mean                                                                  | 255777                          | 358168                           |       |
| Median (Q1,Q3)                                                        | 242086<br>(189643,<br>312314)   | 307564<br>(251892,<br>400966)    |       |
| Quartile coefficient of dispersion                                    | 0.24                            | 0.23                             |       |
| <b>Q04756 (Hepatocyte growth factor activator)</b>                    |                                 |                                  | 0.089 |

|                                                       |                                    |                                    |       |
|-------------------------------------------------------|------------------------------------|------------------------------------|-------|
| Min-Max                                               | 39962 - 384725                     | 62400 - 501742                     |       |
| Mean                                                  | 84537                              | 131031                             |       |
| Median (Q1,Q3)                                        | 72939 (62773,<br>87375)            | 86483 (74361,<br>100947)           |       |
| Quartile coefficient of dispersion                    | 0.16                               | 0.15                               |       |
| <b>P02751 (Fibronectin)</b>                           |                                    |                                    | 0.101 |
| Min-Max                                               | 110463 -<br>1991056                | 255294 -<br>1898594                |       |
| Mean                                                  | 601258                             | 911225                             |       |
| Median (Q1,Q3)                                        | 505192<br>(313569,<br>793399)      | 776456<br>(625711,<br>1338264)     |       |
| Quartile coefficient of dispersion                    | 0.43                               | 0.36                               |       |
| <b>P04196 (Histidine-rich glycoprotein)</b>           |                                    |                                    | 0.101 |
| Min-Max                                               | 415218 -<br>1767001                | 497710 -<br>1961898                |       |
| Mean                                                  | 783318                             | 977359                             |       |
| Median (Q1,Q3)                                        | 732850<br>(562310,<br>900453)      | 882510<br>(775691,<br>1033726)     |       |
| Quartile coefficient of dispersion                    | 0.23                               | 0.14                               |       |
| <b>P01857 (Immunoglobulin heavy constant gamma 1)</b> |                                    |                                    | 0.108 |
| Min-Max                                               | 6398858 -<br>14836843              | 3663247 -<br>12344808              |       |
| Mean                                                  | 10774948                           | 9079869                            |       |
| Median (Q1,Q3)                                        | 10851254<br>(9884772,<br>11934331) | 10266224<br>(7916161,<br>11055019) |       |
| Quartile coefficient of dispersion                    | 0.09                               | 0.17                               |       |
| <b>P04040 (Catalase)</b>                              |                                    |                                    | 0.108 |
| Min-Max                                               | 46883 - 808154                     | 47169 - 589779                     |       |
| Mean                                                  | 127072                             | 130921                             |       |

|                                                     |                               |                               |       |
|-----------------------------------------------------|-------------------------------|-------------------------------|-------|
| Median (Q1,Q3)                                      | 88627 (71778,<br>113413)      | 63494 (57686,<br>105098)      |       |
| Quartile coefficient of dispersion                  | 0.22                          | 0.29                          |       |
| <b>Q96PD5 (N-acetylmuramoyl-L-alanine amidase)</b>  |                               |                               | 0.115 |
| Min-Max                                             | 39539 - 199252                | 97282 - 140890                |       |
| Mean                                                | 108000                        | 122642                        |       |
| Median (Q1,Q3)                                      | 112524 (96332,<br>126156)     | 128095<br>(115460,<br>129808) |       |
| Quartile coefficient of dispersion                  | 0.13                          | 0.06                          |       |
| <b>P60709 (Actin, cytoplasmic 1)</b>                |                               |                               | 0.123 |
| Min-Max                                             | 50449 -<br>2140277            | 65909 - 308627                |       |
| Mean                                                | 154333                        | 121433                        |       |
| Median (Q1,Q3)                                      | 84909 (65096,<br>101896)      | 105752 (82293,<br>118050)     |       |
| Quartile coefficient of dispersion                  | 0.22                          | 0.18                          |       |
| <b>P01700 (Immunoglobulin lambda variable 1-47)</b> |                               |                               | 0.123 |
| Min-Max                                             | 393248 -<br>1489365           | 436039 -<br>1161524           |       |
| Mean                                                | 814806                        | 676260                        |       |
| Median (Q1,Q3)                                      | 783016<br>(657674,<br>981802) | 616186<br>(511789,<br>824750) |       |
| Quartile coefficient of dispersion                  | 0.2                           | 0.23                          |       |
| <b>Q13790 (Apolipoprotein F)</b>                    |                               |                               | 0.123 |
| Min-Max                                             | 13604 - 79353                 | 16606 - 91246                 |       |
| Mean                                                | 31685                         | 41015                         |       |
| Median (Q1,Q3)                                      | 27506 (21217,<br>35918)       | 38647 (28949,<br>45352)       |       |
| Quartile coefficient of dispersion                  | 0.26                          | 0.22                          |       |

|                                                    |                                    |                                   |       |
|----------------------------------------------------|------------------------------------|-----------------------------------|-------|
| <b>P00450 (Ceruloplasmin)</b>                      |                                    |                                   | 0.131 |
| Min-Max                                            | 694968 -<br>3572622                | 2053853 -<br>3599215              |       |
| Mean                                               | 2212000                            | 2606122                           |       |
| Median (Q1,Q3)                                     | 2278469<br>(1860124,<br>2623016)   | 2327312<br>(2251500,<br>2805438)  |       |
| Quartile coefficient of dispersion                 | 0.17                               | 0.11                              |       |
| <b>P00738 (Haptoglobin)</b>                        |                                    |                                   | 0.139 |
| Min-Max                                            | 125094 -<br>35570728               | 4231652 -<br>13586900             |       |
| Mean                                               | 12989227                           | 9551216                           |       |
| Median (Q1,Q3)                                     | 12467390<br>(8856030,<br>16616488) | 9425717<br>(8329927,<br>11898778) |       |
| Quartile coefficient of dispersion                 | 0.3                                | 0.18                              |       |
| <b>P04264 (Keratin, type II cytoskeletal 1)</b>    |                                    |                                   | 0.139 |
| Min-Max                                            | 103159 -<br>773644                 | 112738 -<br>715046                |       |
| Mean                                               | 283875                             | 413853                            |       |
| Median (Q1,Q3)                                     | 209338<br>(168292,<br>421144)      | 356162<br>(207466,<br>660444)     |       |
| Quartile coefficient of dispersion                 | 0.43                               | 0.52                              |       |
| <b>P43251 (Biotinidase)</b>                        |                                    |                                   | 0.139 |
| Min-Max                                            | 29613 - 416652                     | 37134 - 433061                    |       |
| Mean                                               | 78765                              | 95029                             |       |
| Median (Q1,Q3)                                     | 66367 (56265,<br>79234)            | 57117 (46422,<br>58337)           |       |
| Quartile coefficient of dispersion                 | 0.17                               | 0.11                              |       |
| <b>P07358 (Complement component C8 beta chain)</b> |                                    |                                   | 0.147 |

|                                                       |                                  |                                  |       |
|-------------------------------------------------------|----------------------------------|----------------------------------|-------|
| Min-Max                                               | 42432 - 317497                   | 107220 - 318705                  |       |
| Mean                                                  | 179169                           | 226294                           |       |
| Median (Q1,Q3)                                        | 173510<br>(131010,<br>213438)    | 217551<br>(163051,<br>301830)    |       |
| Quartile coefficient of dispersion                    | 0.24                             | 0.3                              |       |
| <b>P35542 (Serum amyloid A-4 protein)</b>             |                                  |                                  | 0.147 |
| Min-Max                                               | 170734 - 804320                  | 187251 - 845550                  |       |
| Mean                                                  | 416364                           | 528210                           |       |
| Median (Q1,Q3)                                        | 408941<br>(297385,<br>496471)    | 514930<br>(399622,<br>638956)    |       |
| Quartile coefficient of dispersion                    | 0.25                             | 0.23                             |       |
| <b>P05155 (Plasma protease C1 inhibitor)</b>          |                                  |                                  | 0.176 |
| Min-Max                                               | 892556 - 4216511                 | 2359601 - 4540704                |       |
| Mean                                                  | 2632196                          | 3102285                          |       |
| Median (Q1,Q3)                                        | 2625369<br>(2268419,<br>3036883) | 2856080<br>(2561660,<br>3366572) |       |
| Quartile coefficient of dispersion                    | 0.14                             | 0.14                             |       |
| <b>P01859 (Immunoglobulin heavy constant gamma 2)</b> |                                  |                                  | 0.176 |
| Min-Max                                               | 263387 - 3554534                 | 1822449 - 3537976                |       |
| Mean                                                  | 2200635                          | 2731595                          |       |
| Median (Q1,Q3)                                        | 2209864<br>(1579499,<br>3213859) | 2814834<br>(2649962,<br>3054858) |       |
| Quartile coefficient of dispersion                    | 0.34                             | 0.07                             |       |
| <b>P18428 (Lipopolysaccharide-binding protein)</b>    |                                  |                                  | 0.197 |



|                                                 |                                |                                 |       |
|-------------------------------------------------|--------------------------------|---------------------------------|-------|
| Min-Max                                         | 47282 - 408017                 | 121968 - 796290                 |       |
| Mean                                            | 156426                         | 241781                          |       |
| Median (Q1,Q3)                                  | 149365<br>(116657,<br>180032)  | 163423<br>(134177,<br>204182)   |       |
| Quartile coefficient of dispersion              | 0.21                           | 0.21                            |       |
| <b>P06276 (Cholinesterase)</b>                  |                                |                                 | 0.197 |
| Min-Max                                         | 31971 - 173555                 | 47235 - 1470754                 |       |
| Mean                                            | 76130                          | 240499                          |       |
| Median (Q1,Q3)                                  | 69436 (51367,<br>90692)        | 89122 (76543,<br>99636)         |       |
| Quartile coefficient of dispersion              | 0.28                           | 0.13                            |       |
| <b>P00740 (Coagulation factor IX)</b>           |                                |                                 | 0.197 |
| Min-Max                                         | 3734 - 138924                  | 12536 - 61368                   |       |
| Mean                                            | 23704                          | 28281                           |       |
| Median (Q1,Q3)                                  | 19812 (15019,<br>26463)        | 27790 (18477,<br>31454)         |       |
| Quartile coefficient of dispersion              | 0.28                           | 0.26                            |       |
| <b>P08603 (Complement factor H)</b>             |                                |                                 | 0.208 |
| Min-Max                                         | 426092 - 1505914               | 848817 - 2203213                |       |
| Mean                                            | 952226                         | 1150990                         |       |
| Median (Q1,Q3)                                  | 949090<br>(811351,<br>1055967) | 1014026<br>(950785,<br>1052490) |       |
| Quartile coefficient of dispersion              | 0.13                           | 0.05                            |       |
| <b>P00488 (Coagulation factor XIII A chain)</b> |                                |                                 | 0.208 |
| Min-Max                                         | 42512 - 636897                 | 49229 - 913390                  |       |
| Mean                                            | 105417                         | 185849                          |       |

|                                               |                                  |                                  |       |
|-----------------------------------------------|----------------------------------|----------------------------------|-------|
| Median (Q1,Q3)                                | 90350 (66827,<br>106538)         | 105374 (86718,<br>111905)        |       |
| Quartile coefficient of dispersion            | 0.23                             | 0.13                             |       |
| <b>P04114 (Apolipoprotein B-100)</b>          |                                  |                                  | 0.219 |
| Min-Max                                       | 367566 -<br>1536343              | 400100 -<br>2261530              |       |
| Mean                                          | 911969                           | 1133218                          |       |
| Median (Q1,Q3)                                | 850452<br>(711516,<br>1128086)   | 1041452<br>(922611,<br>1299031)  |       |
| Quartile coefficient of dispersion            | 0.23                             | 0.17                             |       |
| <b>P10909 (Clusterin)</b>                     |                                  |                                  | 0.219 |
| Min-Max                                       | 728586 -<br>3189695              | 1550574 -<br>3386758             |       |
| Mean                                          | 2140037                          | 2453760                          |       |
| Median (Q1,Q3)                                | 2102457<br>(1775252,<br>2458829) | 2237078<br>(2158309,<br>2746152) |       |
| Quartile coefficient of dispersion            | 0.16                             | 0.12                             |       |
| <b>P07225 (Vitamin K-dependent protein S)</b> |                                  |                                  | 0.231 |
| Min-Max                                       | 87605 - 405897                   | 260051 -<br>755011               |       |
| Mean                                          | 286094                           | 363667                           |       |
| Median (Q1,Q3)                                | 303492<br>(253964,<br>324241)    | 307150<br>(297831,<br>333180)    |       |
| Quartile coefficient of dispersion            | 0.12                             | 0.06                             |       |
| <b>P05452 (Tetranectin)</b>                   |                                  |                                  | 0.231 |
| Min-Max                                       | 38132 - 149225                   | 49685 - 169895                   |       |
| Mean                                          | 85149                            | 100505                           |       |
| Median (Q1,Q3)                                | 83204 (60235,<br>103894)         | 94668 (78902,<br>111420)         |       |

|                                               |                                     |                                     |       |
|-----------------------------------------------|-------------------------------------|-------------------------------------|-------|
| Quartile coefficient of dispersion            | 0.27                                | 0.17                                |       |
| <b>O14791 (Apolipoprotein L1)</b>             |                                     |                                     | 0.244 |
| Min-Max                                       | 80053 - 469266                      | 105058 - 734101                     |       |
| Mean                                          | 242126                              | 239885                              |       |
| Median (Q1,Q3)                                | 232958<br>(176803,<br>295702)       | 192362<br>(159354,<br>214474)       |       |
| Quartile coefficient of dispersion            | 0.25                                | 0.15                                |       |
| <b>P51884 (Lumican)</b>                       |                                     |                                     | 0.244 |
| Min-Max                                       | 117503 - 475138                     | 182397 - 2199552                    |       |
| Mean                                          | 259266                              | 492931                              |       |
| Median (Q1,Q3)                                | 248512<br>(193288,<br>300842)       | 273409<br>(244597,<br>331222)       |       |
| Quartile coefficient of dispersion            | 0.22                                | 0.15                                |       |
| <b>POCOL4 (Complement C4-A)</b>               |                                     |                                     | 0.257 |
| Min-Max                                       | 59109 - 671783                      | 195874 - 930713                     |       |
| Mean                                          | 289040                              | 388853                              |       |
| Median (Q1,Q3)                                | 302997<br>(189658,<br>357776)       | 316717<br>(270189,<br>392431)       |       |
| Quartile coefficient of dispersion            | 0.31                                | 0.18                                |       |
| <b>P01834 (Immunoglobulin kappa constant)</b> |                                     |                                     | 0.257 |
| Min-Max                                       | 5361350 - 28723564                  | 9225106 - 24416188                  |       |
| Mean                                          | 17723198                            | 15276056                            |       |
| Median (Q1,Q3)                                | 16062868<br>(13035784,<br>23907197) | 12659973<br>(11621238,<br>18735003) |       |
| Quartile coefficient of dispersion            | 0.29                                | 0.23                                |       |

|                                                  |                                  |                                  |       |
|--------------------------------------------------|----------------------------------|----------------------------------|-------|
| <b>P08185 (Corticosteroid-binding globulin)</b>  |                                  |                                  | 0.257 |
| Min-Max                                          | 111430 -<br>731478               | 259414 -<br>609671               |       |
| Mean                                             | 347686                           | 401611                           |       |
| Median (Q1,Q3)                                   | 351135<br>(283266,<br>406317)    | 342788<br>(324727,<br>481309)    |       |
| Quartile coefficient of dispersion               | 0.18                             | 0.19                             |       |
| <b>P27169 (Serum paraoxonase/arylesterase 1)</b> |                                  |                                  | 0.270 |
| Min-Max                                          | 102886 -<br>1542703              | 297575 -<br>1073647              |       |
| Mean                                             | 527220                           | 610512                           |       |
| Median (Q1,Q3)                                   | 476009<br>(308845,<br>696234)    | 611893<br>(490910,<br>633164)    |       |
| Quartile coefficient of dispersion               | 0.39                             | 0.13                             |       |
| <b>P01011 (Alpha-1-antichymotrypsin)</b>         |                                  |                                  | 0.284 |
| Min-Max                                          | 295102 -<br>4856160              | 1983686 -<br>5006294             |       |
| Mean                                             | 2784498                          | 3318850                          |       |
| Median (Q1,Q3)                                   | 2751057<br>(2063687,<br>3695390) | 2945480<br>(2810136,<br>3815903) |       |
| Quartile coefficient of dispersion               | 0.28                             | 0.15                             |       |
| <b>P02652 (Apolipoprotein A-II)</b>              |                                  |                                  | 0.284 |
| Min-Max                                          | 580239 -<br>4675204              | 1358009 -<br>4084919             |       |
| Mean                                             | 2342500                          | 2774971                          |       |
| Median (Q1,Q3)                                   | 2213564<br>(1807072,<br>3086422) | 3001920<br>(1933869,<br>3632855) |       |
| Quartile coefficient of dispersion               | 0.26                             | 0.31                             |       |
| <b>P05156 (Complement factor I)</b>              |                                  |                                  | 0.284 |

|                                                         |                            |                            |       |
|---------------------------------------------------------|----------------------------|----------------------------|-------|
| Min-Max                                                 | 131774 - 614690            | 272249 - 638451            |       |
| Mean                                                    | 326779                     | 393357                     |       |
| Median (Q1,Q3)                                          | 343309<br>(211347, 384158) | 360788<br>(320394, 375960) |       |
| Quartile coefficient of dispersion                      | 0.29                       | 0.08                       |       |
| <b>P01782 (Immunoglobulin heavy variable 3-9)</b>       |                            |                            | 0.284 |
| Min-Max                                                 | 17656 - 145862             | 28264 - 745192             |       |
| Mean                                                    | 53849                      | 132024                     |       |
| Median (Q1,Q3)                                          | 43502 (32338, 68124)       | 59358 (43892, 73521)       |       |
| Quartile coefficient of dispersion                      | 0.36                       | 0.25                       |       |
| <b>P04003 (C4b-binding protein alpha chain)</b>         |                            |                            | 0.299 |
| Min-Max                                                 | 68853 - 1085186            | 368512 - 1664406           |       |
| Mean                                                    | 656176                     | 805768                     |       |
| Median (Q1,Q3)                                          | 641605<br>(509450, 834899) | 704772<br>(585577, 950119) |       |
| Quartile coefficient of dispersion                      | 0.24                       | 0.24                       |       |
| <b>O75882 (Attractin)</b>                               |                            |                            | 0.299 |
| Min-Max                                                 | 25819 - 262834             | 62250 - 428148             |       |
| Mean                                                    | 101069                     | 144938                     |       |
| Median (Q1,Q3)                                          | 90632 (65234, 106557)      | 95917 (82757, 114194)      |       |
| Quartile coefficient of dispersion                      | 0.24                       | 0.16                       |       |
| <b>A0A075B6K4 (Immunoglobulin lambda variable 3-10)</b> |                            |                            | 0.299 |
| Min-Max                                                 | 8875 - 113227              | 7469 - 41828               |       |
| Mean                                                    | 24537                      | 18865                      |       |

|                                                     |                            |                           |       |
|-----------------------------------------------------|----------------------------|---------------------------|-------|
| Median (Q1,Q3)                                      | 17873 (15250, 27177)       | 16468 (13321, 19688)      |       |
| Quartile coefficient of dispersion                  | 0.28                       | 0.19                      |       |
| <b>P06681 (Complement C2)</b>                       |                            |                           | 0.313 |
| Min-Max                                             | 110305 - 590014            | 157878 - 447945           |       |
| Mean                                                | 211737                     | 238124                    |       |
| Median (Q1,Q3)                                      | 202764 (169684, 225590)    | 219595 (182008, 237081)   |       |
| Quartile coefficient of dispersion                  | 0.14                       | 0.13                      |       |
| <b>P01721 (Immunoglobulin lambda variable 6-57)</b> |                            |                           | 0.313 |
| Min-Max                                             | 20640 - 155688             | 12900 - 501520            |       |
| Mean                                                | 46487                      | 95685                     |       |
| Median (Q1,Q3)                                      | 39070 (33626, 55364)       | 46939 (46600, 51193)      |       |
| Quartile coefficient of dispersion                  | 0.24                       | 0.05                      |       |
| <b>P19652 (Alpha-1-acid glycoprotein 2)</b>         |                            |                           | 0.313 |
| Min-Max                                             | 333676 - 2623202           | 612525 - 3064895          |       |
| Mean                                                | 1425755                    | 1294236                   |       |
| Median (Q1,Q3)                                      | 1400451 (1006661, 1789604) | 1233688 (733502, 1269781) |       |
| Quartile coefficient of dispersion                  | 0.28                       | 0.27                      |       |
| <b>P15169 (Carboxypeptidase N catalytic chain)</b>  |                            |                           | 0.313 |
| Min-Max                                             | 15720 - 345576             | 19622 - 204230            |       |
| Mean                                                | 45006                      | 56504                     |       |
| Median (Q1,Q3)                                      | 34567 (26952, 44773)       | 39744 (33673, 49627)      |       |
| Quartile coefficient of dispersion                  | 0.25                       | 0.19                      |       |

|                                                   |                               |                               |       |
|---------------------------------------------------|-------------------------------|-------------------------------|-------|
| <b>P02748 (Complement component C9)</b>           |                               |                               | 0.345 |
| Min-Max                                           | 259764 -<br>1144841           | 452607 -<br>1458914           |       |
| Mean                                              | 642724                        | 758058                        |       |
| Median (Q1,Q3)                                    | 614804<br>(546626,<br>733764) | 634323<br>(614586,<br>782599) |       |
| Quartile coefficient of dispersion                | 0.15                          | 0.12                          |       |
| <b>P02743 (Serum amyloid P-component)</b>         |                               |                               | 0.345 |
| Min-Max                                           | 146313 -<br>803665            | 393077 -<br>1433988           |       |
| Mean                                              | 519268                        | 652821                        |       |
| Median (Q1,Q3)                                    | 496797<br>(374381,<br>667676) | 519754<br>(476379,<br>662951) |       |
| Quartile coefficient of dispersion                | 0.28                          | 0.16                          |       |
| <b>P06396 (Gelsolin)</b>                          |                               |                               | 0.361 |
| Min-Max                                           | 209206 -<br>720293            | 285290 -<br>750639            |       |
| Mean                                              | 480124                        | 515742                        |       |
| Median (Q1,Q3)                                    | 469028<br>(431968,<br>540223) | 486715<br>(472188,<br>575988) |       |
| Quartile coefficient of dispersion                | 0.11                          | 0.1                           |       |
| <b>P06702 (Protein S100-A9)</b>                   |                               |                               | 0.361 |
| Min-Max                                           | 3467 - 367227                 | 6819 - 83340                  |       |
| Mean                                              | 24309                         | 23506                         |       |
| Median (Q1,Q3)                                    | 10990 (7680,<br>14616)        | 15734 (8851,<br>19148)        |       |
| Quartile coefficient of dispersion                | 0.31                          | 0.37                          |       |
| <b>P02750 (Leucine-rich alpha-2-glycoprotein)</b> |                               |                               | 0.378 |

|                                                |                            |                             |       |
|------------------------------------------------|----------------------------|-----------------------------|-------|
| Min-Max                                        | 280561 - 2399817           | 476000 - 1353170            |       |
| Mean                                           | 832665                     | 862778                      |       |
| Median (Q1,Q3)                                 | 752448<br>(581753, 848619) | 754917<br>(741307, 1007670) |       |
| Quartile coefficient of dispersion             | 0.19                       | 0.15                        |       |
| <b>P11226 (Mannose-binding protein C)</b>      |                            |                             | 0.378 |
| Min-Max                                        | 13914 - 73974              | 12427 - 339713              |       |
| Mean                                           | 41307                      | 65567                       |       |
| Median (Q1,Q3)                                 | 36159 (28286, 53762)       | 28593 (25305, 44558)        |       |
| Quartile coefficient of dispersion             | 0.31                       | 0.28                        |       |
| <b>Q15848 (Adiponectin)</b>                    |                            |                             | 0.378 |
| Min-Max                                        | 18655 - 179730             | 33734 - 320244              |       |
| Mean                                           | 56824                      | 86876                       |       |
| Median (Q1,Q3)                                 | 52913 (34782, 72800)       | 54207 (38575, 87704)        |       |
| Quartile coefficient of dispersion             | 0.35                       | 0.39                        |       |
| <b>P35527 (Keratin, type I cytoskeletal 9)</b> |                            |                             | 0.395 |
| Min-Max                                        | 68545 - 501938             | 73286 - 646558              |       |
| Mean                                           | 161607                     | 237918                      |       |
| Median (Q1,Q3)                                 | 132886<br>(109020, 178337) | 146160<br>(124126, 324161)  |       |
| Quartile coefficient of dispersion             | 0.24                       | 0.45                        |       |
| <b>P00747 (Plasminogen)</b>                    |                            |                             | 0.395 |
| Min-Max                                        | 344947 - 1380362           | 610850 - 1972420            |       |
| Mean                                           | 910589                     | 931553                      |       |



|                                                  |                                  |                                  |       |
|--------------------------------------------------|----------------------------------|----------------------------------|-------|
| Median (Q1,Q3)                                   | 881574<br>(760967,<br>1077137)   | 769266<br>(710835,<br>950520)    |       |
| Quartile coefficient of dispersion               | 0.17                             | 0.14                             |       |
| <b>P09871 (Complement C1s subcomponent)</b>      |                                  |                                  | 0.395 |
| Min-Max                                          | 108067 -<br>371486               | 157218 -<br>402779               |       |
| Mean                                             | 218382                           | 245088                           |       |
| Median (Q1,Q3)                                   | 202683<br>(184702,<br>247982)    | 228654<br>(191716,<br>264005)    |       |
| Quartile coefficient of dispersion               | 0.15                             | 0.16                             |       |
| <b>P0DOY3 (Immunoglobulin lambda constant 3)</b> |                                  |                                  | 0.395 |
| Min-Max                                          | 18255 - 214262                   | 70446 - 234211                   |       |
| Mean                                             | 123944                           | 143942                           |       |
| Median (Q1,Q3)                                   | 121017 (93301,<br>160829)        | 153973 (88248,<br>161924)        |       |
| Quartile coefficient of dispersion               | 0.27                             | 0.29                             |       |
| <b>P49908 (Selenoprotein P)</b>                  |                                  |                                  | 0.395 |
| Min-Max                                          | 20288 - 451157                   | 37768 -<br>1786365               |       |
| Mean                                             | 76908                            | 256884                           |       |
| Median (Q1,Q3)                                   | 63860 (47940,<br>85894)          | 70207 (63309,<br>79716)          |       |
| Quartile coefficient of dispersion               | 0.28                             | 0.11                             |       |
| <b>P00751 (Complement factor B)</b>              |                                  |                                  | 0.413 |
| Min-Max                                          | 960740 -<br>2735945              | 1109437 -<br>2334895             |       |
| Mean                                             | 1477427                          | 1547575                          |       |
| Median (Q1,Q3)                                   | 1346865<br>(1189000,<br>1742790) | 1567165<br>(1275634,<br>1690612) |       |

|                                       |                                     |                                     |       |
|---------------------------------------|-------------------------------------|-------------------------------------|-------|
| Quartile coefficient of dispersion    | 0.19                                | 0.14                                |       |
| <b>P02749 (Beta-2-glycoprotein 1)</b> |                                     |                                     | 0.413 |
| Min-Max                               | 39240 -<br>1030631                  | 377961 -<br>1562180                 |       |
| Mean                                  | 588452                              | 731262                              |       |
| Median (Q1,Q3)                        | 614986<br>(441308,<br>763410)       | 687315<br>(509321,<br>758810)       |       |
| Quartile coefficient of dispersion    | 0.27                                | 0.2                                 |       |
| <b>P05090 (Apolipoprotein D)</b>      |                                     |                                     | 0.413 |
| Min-Max                               | 253786 -<br>1460193                 | 367932 -<br>1869649                 |       |
| Mean                                  | 587814                              | 724853                              |       |
| Median (Q1,Q3)                        | 478390<br>(393323,<br>697281)       | 496090<br>(461017,<br>769361)       |       |
| Quartile coefficient of dispersion    | 0.28                                | 0.25                                |       |
| <b>P02655 (Apolipoprotein C-II)</b>   |                                     |                                     | 0.413 |
| Min-Max                               | 295522 -<br>3377463                 | 512848 -<br>1662272                 |       |
| Mean                                  | 1089278                             | 1172480                             |       |
| Median (Q1,Q3)                        | 994302<br>(703092,<br>1392228)      | 1426395<br>(764990,<br>1558006)     |       |
| Quartile coefficient of dispersion    | 0.33                                | 0.34                                |       |
| <b>P02647 (Apolipoprotein A-I)</b>    |                                     |                                     | 0.431 |
| Min-Max                               | 13140959 -<br>46817478              | 16380844 -<br>43937132              |       |
| Mean                                  | 34825150                            | 36129224                            |       |
| Median (Q1,Q3)                        | 35423221<br>(30670201,<br>39886506) | 38442974<br>(37524322,<br>41000155) |       |
| Quartile coefficient of dispersion    | 0.13                                | 0.04                                |       |

|                                                        |                               |                               |       |
|--------------------------------------------------------|-------------------------------|-------------------------------|-------|
| <b>P01042 (Kininogen-1)</b>                            |                               |                               | 0.431 |
| Min-Max                                                | 567195 - 5732788              | 1653875 - 3097381             |       |
| Mean                                                   | 2233417                       | 2346402                       |       |
| Median (Q1,Q3)                                         | 2050522<br>(1757456, 2584213) | 2362545<br>(2039675, 2501430) |       |
| Quartile coefficient of dispersion                     | 0.19                          | 0.1                           |       |
| <b>P25311 (Zinc-alpha-2-glycoprotein)</b>              |                               |                               | 0.431 |
| Min-Max                                                | 402477 - 1588930              | 613008 - 2153163              |       |
| Mean                                                   | 1049927                       | 1205383                       |       |
| Median (Q1,Q3)                                         | 1029641<br>(767945, 1363843)  | 1093084<br>(940889, 1561449)  |       |
| Quartile coefficient of dispersion                     | 0.28                          | 0.25                          |       |
| <b>Q9UK55 (Protein Z-dependent protease inhibitor)</b> |                               |                               | 0.431 |
| Min-Max                                                | 17533 - 136712                | 30586 - 240956                |       |
| Mean                                                   | 57733                         | 68930                         |       |
| Median (Q1,Q3)                                         | 58693 (42215, 68405)          | 53598 (43177, 56303)          |       |
| Quartile coefficient of dispersion                     | 0.24                          | 0.13                          |       |
| <b>P20742 (Pregnancy zone protein)</b>                 |                               |                               | 0.431 |
| Min-Max                                                | 5155 - 107858                 | 11170 - 161144                |       |
| Mean                                                   | 37640                         | 42868                         |       |
| Median (Q1,Q3)                                         | 25753 (17436, 48342)          | 14777 (12553, 63984)          |       |
| Quartile coefficient of dispersion                     | 0.47                          | 0.67                          |       |
| <b>Q92954 (Proteoglycan 4)</b>                         |                               |                               | 0.431 |
| Min-Max                                                | 4370 - 91897                  | 6997 - 48290                  |       |
| Mean                                                   | 20949                         | 21781                         |       |

|                                                              |                            |                            |       |
|--------------------------------------------------------------|----------------------------|----------------------------|-------|
| Median (Q1,Q3)                                               | 14599 (9132, 25642)        | 18007 (12541, 27053)       |       |
| Quartile coefficient of dispersion                           | 0.47                       | 0.37                       |       |
| <b>P26927 (Hepatocyte growth factor-like protein)</b>        |                            |                            | 0.431 |
| Min-Max                                                      | 5388 - 74374               | 7402 - 106843              |       |
| Mean                                                         | 19266                      | 24996                      |       |
| Median (Q1,Q3)                                               | 16770 (13330, 22478)       | 14131 (9998, 17317)        |       |
| Quartile coefficient of dispersion                           | 0.26                       | 0.27                       |       |
| <b>Q14624 (Inter-alpha-trypsin inhibitor heavy chain H4)</b> |                            |                            | 0.450 |
| Min-Max                                                      | 611294 - 3081254           | 1778669 - 2771681          |       |
| Mean                                                         | 1980115                    | 2242485                    |       |
| Median (Q1,Q3)                                               | 2080659 (1598068, 2532355) | 2311345 (2006396, 2424340) |       |
| Quartile coefficient of dispersion                           | 0.23                       | 0.09                       |       |
| <b>P02774 (Vitamin D-binding protein)</b>                    |                            |                            | 0.469 |
| Min-Max                                                      | 671754 - 3301599           | 1378974 - 2302224          |       |
| Mean                                                         | 1746611                    | 1827069                    |       |
| Median (Q1,Q3)                                               | 1710643 (1380582, 2013492) | 1768512 (1612509, 1963019) |       |
| Quartile coefficient of dispersion                           | 0.19                       | 0.1                        |       |
| <b>P05546 (Heparin cofactor 2)</b>                           |                            |                            | 0.469 |
| Min-Max                                                      | 290281 - 1446047           | 660936 - 2114124           |       |
| Mean                                                         | 910930                     | 1074553                    |       |
| Median (Q1,Q3)                                               | 916967 (771885, 1064375)   | 955905 (781388, 1190278)   |       |

|                                       |                            |                            |       |
|---------------------------------------|----------------------------|----------------------------|-------|
| Quartile coefficient of dispersion    | 0.16                       | 0.21                       |       |
| <b>P61769 (Beta-2-microglobulin)</b>  |                            |                            | 0.469 |
| Min-Max                               | 8824 - 131314              | 10037 - 209595             |       |
| Mean                                  | 29885                      | 46791                      |       |
| Median (Q1,Q3)                        | 24131 (14692, 29930)       | 25809 (20311, 35316)       |       |
| Quartile coefficient of dispersion    | 0.34                       | 0.27                       |       |
| <b>P12259 (Coagulation factor V)</b>  |                            |                            | 0.469 |
| Min-Max                               | 36466 - 473193             | 62953 - 852378             |       |
| Mean                                  | 170149                     | 237372                     |       |
| Median (Q1,Q3)                        | 135702 (63859, 235384)     | 147731 (92060, 267449)     |       |
| Quartile coefficient of dispersion    | 0.57                       | 0.49                       |       |
| <b>P01024 (Complement C3)</b>         |                            |                            | 0.488 |
| Min-Max                               | 1570059 - 10146209         | 4319991 - 7993289          |       |
| Mean                                  | 6201416                    | 6703546                    |       |
| Median (Q1,Q3)                        | 6542065 (4959990, 7577238) | 7099802 (6422460, 7409153) |       |
| Quartile coefficient of dispersion    | 0.21                       | 0.07                       |       |
| <b>P04275 (von Willebrand factor)</b> |                            |                            | 0.488 |
| Min-Max                               | 13112 - 214301             | 26462 - 111677             |       |
| Mean                                  | 63978                      | 59148                      |       |
| Median (Q1,Q3)                        | 38692 (26946, 83714)       | 66266 (28966, 70902)       |       |
| Quartile coefficient of dispersion    | 0.51                       | 0.42                       |       |
| <b>P00915 (Carbonic anhydrase 1)</b>  |                            |                            | 0.488 |
| Min-Max                               | 40336 - 9384411            | 61566 - 656350             |       |
| Mean                                  | 423862                     | 202986                     |       |

|                                                     |                               |                               |       |
|-----------------------------------------------------|-------------------------------|-------------------------------|-------|
| Median (Q1,Q3)                                      | 111386 (74301, 188890)        | 123910 (83770, 201078)        |       |
| Quartile coefficient of dispersion                  | 0.44                          | 0.41                          |       |
| <b>P80748 (Immunoglobulin lambda variable 3-21)</b> |                               |                               | 0.488 |
| Min-Max                                             | 52309 - 461490                | 94764 - 2072862               |       |
| Mean                                                | 179045                        | 386861                        |       |
| Median (Q1,Q3)                                      | 160390 (123397, 233513)       | 174033 (138463, 240922)       |       |
| Quartile coefficient of dispersion                  | 0.31                          | 0.27                          |       |
| <b>P02671 (Fibrinogen alpha chain)</b>              |                               |                               | 0.508 |
| Min-Max                                             | 7478264 - 23758028            | 12731130 - 16956510           |       |
| Mean                                                | 14164009                      | 14766440                      |       |
| Median (Q1,Q3)                                      | 14402854 (11196350, 16065891) | 14609937 (13244560, 15984800) |       |
| Quartile coefficient of dispersion                  | 0.18                          | 0.09                          |       |
| <b>P01019 (Angiotensinogen)</b>                     |                               |                               | 0.508 |
| Min-Max                                             | 111716 - 879236               | 557222 - 1189082              |       |
| Mean                                                | 591106                        | 688067                        |       |
| Median (Q1,Q3)                                      | 607907 (482768, 722793)       | 595735 (571566, 724296)       |       |
| Quartile coefficient of dispersion                  | 0.2                           | 0.12                          |       |
| <b>P0C0L5 (Complement C4-B)</b>                     |                               |                               | 0.508 |
| Min-Max                                             | 26603 - 445014                | 89497 - 489096                |       |
| Mean                                                | 152350                        | 181931                        |       |
| Median (Q1,Q3)                                      | 144210 (75116, 182258)        | 145613 (129861, 169307)       |       |

|                                              |                             |                              |       |
|----------------------------------------------|-----------------------------|------------------------------|-------|
| Quartile coefficient of dispersion           | 0.42                        | 0.13                         |       |
| <b>Q9UGM5 (Fetuin-B)</b>                     |                             |                              | 0.508 |
| Min-Max                                      | 11508 - 190623              | 14304 - 318028               |       |
| Mean                                         | 34773                       | 56598                        |       |
| Median (Q1,Q3)                               | 28798 (21905, 36639)        | 25377 (17763, 31476)         |       |
| Quartile coefficient of dispersion           | 0.25                        | 0.28                         |       |
| <b>P09172 (Dopamine beta-hydroxylase)</b>    |                             |                              | 0.508 |
| Min-Max                                      | 6208 - 60650                | 7227 - 44340                 |       |
| Mean                                         | 25020                       | 21208                        |       |
| Median (Q1,Q3)                               | 19945 (14199, 36018)        | 20077 (9037, 26591)          |       |
| Quartile coefficient of dispersion           | 0.43                        | 0.49                         |       |
| <b>P01023 (Alpha-2-macroglobulin)</b>        |                             |                              | 0.529 |
| Min-Max                                      | 2791331 - 14238251          | 6909436 - 17564335           |       |
| Mean                                         | 9257932                     | 10528031                     |       |
| Median (Q1,Q3)                               | 8613371 (7571907, 11472823) | 10133962 (7043668, 12369203) |       |
| Quartile coefficient of dispersion           | 0.2                         | 0.27                         |       |
| <b>P06727 (Apolipoprotein A-IV)</b>          |                             |                              | 0.529 |
| Min-Max                                      | 747895 - 5768946            | 1194445 - 4638149            |       |
| Mean                                         | 2400659                     | 2619502                      |       |
| Median (Q1,Q3)                               | 2289173 (1734716, 3067531)  | 2371660 (2273143, 2740083)   |       |
| Quartile coefficient of dispersion           | 0.28                        | 0.09                         |       |
| <b>P22792 (Carboxypeptidase N subunit 2)</b> |                             |                              | 0.529 |
| Min-Max                                      | 89005 - 651470              | 84480 - 306467               |       |

|                                                                  |                               |                               |       |
|------------------------------------------------------------------|-------------------------------|-------------------------------|-------|
| Mean                                                             | 180638                        | 160919                        |       |
| Median (Q1,Q3)                                                   | 168535<br>(140249,<br>189897) | 154972<br>(113824,<br>190186) |       |
| Quartile coefficient of dispersion                               | 0.15                          | 0.25                          |       |
| <b>P32119 (Peroxiredoxin-2)</b>                                  |                               |                               | 0.529 |
| Min-Max                                                          | 24284 -<br>7234159            | 23140 - 277332                |       |
| Mean                                                             | 302822                        | 106830                        |       |
| Median (Q1,Q3)                                                   | 71582 (46300,<br>93039)       | 94152 (47792,<br>120959)      |       |
| Quartile coefficient of dispersion                               | 0.34                          | 0.43                          |       |
| <b>A0A0C4DH68 (Immunoglobulin kappa<br/>variable 2-24)</b>       |                               |                               | 0.529 |
| Min-Max                                                          | 38467 - 217485                | 65853 - 435244                |       |
| Mean                                                             | 120203                        | 157244                        |       |
| Median (Q1,Q3)                                                   | 115570 (94781,<br>162993)     | 123319<br>(105397,<br>158698) |       |
| Quartile coefficient of dispersion                               | 0.26                          | 0.2                           |       |
| <b>P01031 (Complement C5)</b>                                    |                               |                               | 0.550 |
| Min-Max                                                          | 96794 - 970896                | 499405 -<br>799509            |       |
| Mean                                                             | 562814                        | 604388                        |       |
| Median (Q1,Q3)                                                   | 547263<br>(490995,<br>627472) | 545859<br>(529515,<br>702363) |       |
| Quartile coefficient of dispersion                               | 0.12                          | 0.14                          |       |
| <b>P19827 (Inter-alpha-trypsin inhibitor<br/>heavy chain H1)</b> |                               |                               | 0.550 |
| Min-Max                                                          | 373145 -<br>3030206           | 945199 -<br>1832944           |       |
| Mean                                                             | 1393496                       | 1448581                       |       |



|                                                   |                                  |                                  |       |
|---------------------------------------------------|----------------------------------|----------------------------------|-------|
| Median (Q1,Q3)                                    | 1327085<br>(1175751,<br>1686619) | 1426166<br>(1344459,<br>1654618) |       |
| Quartile coefficient of dispersion                | 0.18                             | 0.1                              |       |
| <b>P02538 (Keratin, type II cytoskeletal 6A)</b>  |                                  |                                  | 0.550 |
| Min-Max                                           | 22121 - 81905                    | 24105 - 93012                    |       |
| Mean                                              | 49416                            | 54188                            |       |
| Median (Q1,Q3)                                    | 46365 (38797,<br>55521)          | 53838 (39278,<br>63237)          |       |
| Quartile coefficient of dispersion                | 0.18                             | 0.23                             |       |
| <b>P01602 (Immunoglobulin kappa variable 1-5)</b> |                                  |                                  | 0.550 |
| Min-Max                                           | 33486 - 642323                   | 42540 - 184240                   |       |
| Mean                                              | 99615                            | 92719                            |       |
| Median (Q1,Q3)                                    | 70729 (57449,<br>104792)         | 78988 (63834,<br>121928)         |       |
| Quartile coefficient of dispersion                | 0.29                             | 0.31                             |       |
| <b>Q08380 (Galectin-3-binding protein)</b>        |                                  |                                  | 0.550 |
| Min-Max                                           | 22958 - 183469                   | 41051 - 190648                   |       |
| Mean                                              | 66573                            | 81140                            |       |
| Median (Q1,Q3)                                    | 59791 (46263,<br>74251)          | 61650 (48873,<br>97718)          |       |
| Quartile coefficient of dispersion                | 0.23                             | 0.33                             |       |
| <b>P43652 (Afamin)</b>                            |                                  |                                  | 0.571 |
| Min-Max                                           | 204006 -<br>960322               | 251946 -<br>946895               |       |
| Mean                                              | 515790                           | 499623                           |       |
| Median (Q1,Q3)                                    | 491020<br>(389399,<br>659816)    | 444267<br>(405853,<br>543166)    |       |
| Quartile coefficient of dispersion                | 0.26                             | 0.14                             |       |

|                                                                      |                               |                               |       |
|----------------------------------------------------------------------|-------------------------------|-------------------------------|-------|
| <b>P02746 (Complement C1q subcomponent subunit B)</b>                |                               |                               | 0.571 |
| Min-Max                                                              | 62098 - 509991                | 87684 - 545470                |       |
| Mean                                                                 | 146211                        | 181113                        |       |
| Median (Q1,Q3)                                                       | 134641<br>(119979,<br>155148) | 140234<br>(128702,<br>158955) |       |
| Quartile coefficient of dispersion                                   | 0.13                          | 0.11                          |       |
| <b>P05543 (Thyroxine-binding globulin)</b>                           |                               |                               | 0.592 |
| Min-Max                                                              | 76984 - 783157                | 140189 -<br>631261            |       |
| Mean                                                                 | 222319                        | 254468                        |       |
| Median (Q1,Q3)                                                       | 202397<br>(165394,<br>259498) | 234328<br>(170783,<br>238721) |       |
| Quartile coefficient of dispersion                                   | 0.22                          | 0.17                          |       |
| <b>P80108 (Phosphatidylinositol-glycan-specific phospholipase D)</b> |                               |                               | 0.592 |
| Min-Max                                                              | 41905 - 516452                | 49029 - 183678                |       |
| Mean                                                                 | 97019                         | 96184                         |       |
| Median (Q1,Q3)                                                       | 79105 (65464,<br>104517)      | 87312 (72399,<br>100328)      |       |
| Quartile coefficient of dispersion                                   | 0.23                          | 0.16                          |       |
| <b>P17936 (Insulin-like growth factor-binding protein 3)</b>         |                               |                               | 0.592 |
| Min-Max                                                              | 10671 - 83451                 | 16659 - 146877                |       |
| Mean                                                                 | 36509                         | 42380                         |       |
| Median (Q1,Q3)                                                       | 33833 (26562,<br>42627)       | 32069 (25109,<br>35857)       |       |
| Quartile coefficient of dispersion                                   | 0.23                          | 0.18                          |       |
| <b>P01009 (Alpha-1-antitrypsin)</b>                                  |                               |                               | 0.614 |
| Min-Max                                                              | 9957658 -<br>25154761         | 7212953 -<br>19853089         |       |

|                                                  |                                     |                                     |       |
|--------------------------------------------------|-------------------------------------|-------------------------------------|-------|
| Mean                                             | 15294376                            | 14916802                            |       |
| Median (Q1,Q3)                                   | 15625758<br>(13624533,<br>16610395) | 17440604<br>(13033110,<br>18702564) |       |
| Quartile coefficient of dispersion               | 0.1                                 | 0.18                                |       |
| <b>P02790 (Hemopexin)</b>                        |                                     |                                     | 0.614 |
| Min-Max                                          | 2343793 -<br>9418916                | 4972845 -<br>7536397                |       |
| Mean                                             | 6302251                             | 6223038                             |       |
| Median (Q1,Q3)                                   | 6443158<br>(5490465,<br>7611252)    | 6406561<br>(5606483,<br>6623049)    |       |
| Quartile coefficient of dispersion               | 0.16                                | 0.08                                |       |
| <b>P01871 (Immunoglobulin heavy constant mu)</b> |                                     |                                     | 0.614 |
| Min-Max                                          | 258835 -<br>9420666                 | 1200838 -<br>5985130                |       |
| Mean                                             | 3249709                             | 2799336                             |       |
| Median (Q1,Q3)                                   | 2785544<br>(1963089,<br>4083297)    | 2762409<br>(1520173,<br>2902667)    |       |
| Quartile coefficient of dispersion               | 0.35                                | 0.31                                |       |
| <b>P02763 (Alpha-1-acid glycoprotein 1)</b>      |                                     |                                     | 0.614 |
| Min-Max                                          | 873115 -<br>10413871                | 1227035 -<br>6872573                |       |
| Mean                                             | 3994428                             | 3369421                             |       |
| Median (Q1,Q3)                                   | 3529565<br>(2365995,<br>4858256)    | 2995582<br>(1722094,<br>4445104)    |       |
| Quartile coefficient of dispersion               | 0.34                                | 0.44                                |       |
| <b>P08697 (Alpha-2-antiplasmin)</b>              |                                     |                                     | 0.614 |
| Min-Max                                          | 154784 -<br>575277                  | 218334 -<br>584634                  |       |
| Mean                                             | 308665                              | 297531                              |       |

|                                                                                        |                               |                               |       |
|----------------------------------------------------------------------------------------|-------------------------------|-------------------------------|-------|
| Median (Q1,Q3)                                                                         | 268811<br>(238587,<br>358924) | 251206<br>(228044,<br>310870) |       |
| Quartile coefficient of dispersion                                                     | 0.2                           | 0.15                          |       |
| <b>P35858 (Insulin-like growth factor-binding protein complex acid labile subunit)</b> |                               |                               | 0.614 |
| Min-Max                                                                                | 66821 - 209513                | 71899 - 355364                |       |
| Mean                                                                                   | 126487                        | 136586                        |       |
| Median (Q1,Q3)                                                                         | 121246 (92501,<br>155275)     | 109360 (87534,<br>152331)     |       |
| Quartile coefficient of dispersion                                                     | 0.25                          | 0.27                          |       |
| <b>P03952 (Plasma kallikrein)</b>                                                      |                               |                               | 0.614 |
| Min-Max                                                                                | 103880 -<br>268151            | 90497 - 298158                |       |
| Mean                                                                                   | 182442                        | 189562                        |       |
| Median (Q1,Q3)                                                                         | 178628<br>(149702,<br>205771) | 191292<br>(176586,<br>197334) |       |
| Quartile coefficient of dispersion                                                     | 0.16                          | 0.06                          |       |
| <b>P02745 (Complement C1q subcomponent subunit A)</b>                                  |                               |                               | 0.614 |
| Min-Max                                                                                | 211715 -<br>851096            | 233638 -<br>586558            |       |
| Mean                                                                                   | 389558                        | 347277                        |       |
| Median (Q1,Q3)                                                                         | 331632<br>(293002,<br>445707) | 337162<br>(273894,<br>383708) |       |
| Quartile coefficient of dispersion                                                     | 0.21                          | 0.17                          |       |
| <b>O43866 (CD5 antigen-like)</b>                                                       |                               |                               | 0.614 |
| Min-Max                                                                                | 3480 - 322991                 | 5495 - 410872                 |       |
| Mean                                                                                   | 84633                         | 75018                         |       |
| Median (Q1,Q3)                                                                         | 43668 (7282,<br>116921)       | 28363 (7093,<br>60649)        |       |

|                                                 |                                  |                                  |       |
|-------------------------------------------------|----------------------------------|----------------------------------|-------|
| Quartile coefficient of dispersion              | 0.88                             | 0.79                             |       |
| <b>P01008 (Antithrombin-III)</b>                |                                  |                                  | 0.637 |
| Min-Max                                         | 686696 -<br>3053989              | 1117568 -<br>1888834             |       |
| Mean                                            | 1442060                          | 1455312                          |       |
| Median (Q1,Q3)                                  | 1410175<br>(1138089,<br>1684062) | 1510970<br>(1273287,<br>1582768) |       |
| Quartile coefficient of dispersion              | 0.19                             | 0.11                             |       |
| <b>P04217 (Alpha-1B-glycoprotein)</b>           |                                  |                                  | 0.637 |
| Min-Max                                         | 784767 -<br>2830160              | 1377984 -<br>2080077             |       |
| Mean                                            | 1816931                          | 1759325                          |       |
| Median (Q1,Q3)                                  | 1800820<br>(1574774,<br>2088878) | 1758820<br>(1669808,<br>1804369) |       |
| Quartile coefficient of dispersion              | 0.14                             | 0.04                             |       |
| <b>P68871 (Hemoglobin subunit beta)</b>         |                                  |                                  | 0.637 |
| Min-Max                                         | 686651 -<br>56397097             | 1045548 -<br>12069212            |       |
| Mean                                            | 6696125                          | 5855620                          |       |
| Median (Q1,Q3)                                  | 3863538<br>(2335323,<br>6791359) | 4098570<br>(3002776,<br>9545698) |       |
| Quartile coefficient of dispersion              | 0.49                             | 0.52                             |       |
| <b>P13645 (Keratin, type I cytoskeletal 10)</b> |                                  |                                  | 0.637 |
| Min-Max                                         | 72281 - 453467                   | 36222 - 483570                   |       |
| Mean                                            | 227626                           | 217941                           |       |
| Median (Q1,Q3)                                  | 216553<br>(144119,<br>299036)    | 173810<br>(105877,<br>297077)    |       |
| Quartile coefficient of dispersion              | 0.35                             | 0.47                             |       |

|                                                        |                               |                               |       |
|--------------------------------------------------------|-------------------------------|-------------------------------|-------|
| <b>P00736 (Complement C1r subcomponent)</b>            |                               |                               | 0.637 |
| Min-Max                                                | 138169 - 384868               | 168126 - 975321               |       |
| Mean                                                   | 220273                        | 304762                        |       |
| Median (Q1,Q3)                                         | 213758<br>(181675, 250726)    | 225545<br>(174579, 273733)    |       |
| Quartile coefficient of dispersion                     | 0.16                          | 0.22                          |       |
| <b>A0A0B4J1V0 (Immunoglobulin heavy variable 3-15)</b> |                               |                               | 0.637 |
| Min-Max                                                | 188962 - 3580527              | 521827 - 1332424              |       |
| Mean                                                   | 798757                        | 792180                        |       |
| Median (Q1,Q3)                                         | 724544<br>(582151, 845985)    | 747556<br>(584082, 861816)    |       |
| Quartile coefficient of dispersion                     | 0.18                          | 0.19                          |       |
| <b>P02533 (Keratin, type I cytoskeletal 14)</b>        |                               |                               | 0.637 |
| Min-Max                                                | 31409 - 1652624               | 53725 - 1381918               |       |
| Mean                                                   | 144150                        | 234337                        |       |
| Median (Q1,Q3)                                         | 89070 (65419, 107513)         | 66809 (55853, 106020)         |       |
| Quartile coefficient of dispersion                     | 0.24                          | 0.31                          |       |
| <b>P01619 (Immunoglobulin kappa variable 3-20)</b>     |                               |                               | 0.659 |
| Min-Max                                                | 736309 - 7451024              | 1197981 - 4024721             |       |
| Mean                                                   | 2701506                       | 2457316                       |       |
| Median (Q1,Q3)                                         | 2636005<br>(1888727, 3178117) | 2280211<br>(2076552, 2792819) |       |
| Quartile coefficient of dispersion                     | 0.25                          | 0.15                          |       |

|                                                   |                                     |                                     |       |
|---------------------------------------------------|-------------------------------------|-------------------------------------|-------|
| <b>O75636 (Ficolin-3)</b>                         |                                     |                                     | 0.659 |
| Min-Max                                           | 75125 - 250861                      | 117927 - 421417                     |       |
| Mean                                              | 153101                              | 185548                              |       |
| Median (Q1,Q3)                                    | 149641<br>(134478,<br>175297)       | 143727<br>(131957,<br>196763)       |       |
| Quartile coefficient of dispersion                | 0.13                                | 0.2                                 |       |
| <b>P02768 (Serum albumin)</b>                     |                                     |                                     | 0.682 |
| Min-Max                                           | 28032024 - 99664127                 | 22380121 - 65615663                 |       |
| Mean                                              | 47354612                            | 43743827                            |       |
| Median (Q1,Q3)                                    | 46028851<br>(37443012,<br>54244733) | 47775165<br>(31713569,<br>48737833) |       |
| Quartile coefficient of dispersion                | 0.18                                | 0.21                                |       |
| <b>P02741 (C-reactive protein)</b>                |                                     |                                     | 0.682 |
| Min-Max                                           | 22432 - 566541                      | 23875 - 338987                      |       |
| Mean                                              | 88469                               | 110931                              |       |
| Median (Q1,Q3)                                    | 47497 (36702,<br>98885)             | 34703 (32617,<br>151804)            |       |
| Quartile coefficient of dispersion                | 0.46                                | 0.65                                |       |
| <b>P06312 (Immunoglobulin kappa variable 4-1)</b> |                                     |                                     | 0.682 |
| Min-Max                                           | 265532 - 935607                     | 407135 - 1017303                    |       |
| Mean                                              | 574686                              | 562211                              |       |
| Median (Q1,Q3)                                    | 577032<br>(433523,<br>703772)       | 507600<br>(423351,<br>639438)       |       |
| Quartile coefficient of dispersion                | 0.24                                | 0.2                                 |       |
| <b>P01034 (Cystatin-C)</b>                        |                                     |                                     | 0.682 |
| Min-Max                                           | 9482 - 161425                       | 10622 - 155054                      |       |

|                                           |                               |                               |       |
|-------------------------------------------|-------------------------------|-------------------------------|-------|
| Mean                                      | 23426                         | 33032                         |       |
| Median (Q1,Q3)                            | 16393 (13320,<br>23376)       | 17719 (16030,<br>20574)       |       |
| Quartile coefficient of dispersion        | 0.27                          | 0.12                          |       |
| <b>P29622 (Kallistatin)</b>               |                               |                               | 0.705 |
| Min-Max                                   | 84241 - 465974                | 157068 -<br>718604            |       |
| Mean                                      | 203151                        | 254951                        |       |
| Median (Q1,Q3)                            | 193432<br>(166386,<br>247791) | 204199<br>(181730,<br>228364) |       |
| Quartile coefficient of dispersion        | 0.2                           | 0.11                          |       |
| <b>P13671 (Complement component C6)</b>   |                               |                               | 0.705 |
| Min-Max                                   | 121851 -<br>515388            | 125052 -<br>1035644           |       |
| Mean                                      | 246018                        | 307689                        |       |
| Median (Q1,Q3)                            | 239602<br>(193557,<br>286836) | 234046<br>(183774,<br>281701) |       |
| Quartile coefficient of dispersion        | 0.19                          | 0.21                          |       |
| <b>P0DJ18 (Serum amyloid A-1 protein)</b> |                               |                               | 0.705 |
| Min-Max                                   | 24595 - 855040                | 42378 - 418314                |       |
| Mean                                      | 218919                        | 177286                        |       |
| Median (Q1,Q3)                            | 185535 (95199,<br>321921)     | 167735<br>(129886,<br>187397) |       |
| Quartile coefficient of dispersion        | 0.54                          | 0.18                          |       |
| <b>P02775 (Platelet basic protein)</b>    |                               |                               | 0.705 |
| Min-Max                                   | 16008 - 481447                | 40780 - 178811                |       |
| Mean                                      | 119083                        | 92657                         |       |
| Median (Q1,Q3)                            | 82132 (38038,<br>140891)      | 80290 (55512,<br>115986)      |       |



|                                             |                           |                           |       |
|---------------------------------------------|---------------------------|---------------------------|-------|
| Quartile coefficient of dispersion          | 0.57                      | 0.35                      |       |
| <b>P03951 (Coagulation factor XI)</b>       |                           |                           | 0.705 |
| Min-Max                                     | 27132 -<br>1468952        | 18315 - 142094            |       |
| Mean                                        | 100128                    | 66269                     |       |
| Median (Q1,Q3)                              | 44327 (39717,<br>62279)   | 54846 (40059,<br>86309)   |       |
| Quartile coefficient of dispersion          | 0.22                      | 0.37                      |       |
| <b>O00391 (Sulfhydryl oxidase 1)</b>        |                           |                           | 0.729 |
| Min-Max                                     | 11373 - 66481             | 13184 - 49262             |       |
| Mean                                        | 24598                     | 24505                     |       |
| Median (Q1,Q3)                              | 20296 (16255,<br>26934)   | 20942 (18738,<br>27001)   |       |
| Quartile coefficient of dispersion          | 0.25                      | 0.18                      |       |
| <b>P00739 (Haptoglobin-related protein)</b> |                           |                           | 0.753 |
| Min-Max                                     | 27990 - 303332            | 58781 - 362243            |       |
| Mean                                        | 121338                    | 140527                    |       |
| Median (Q1,Q3)                              | 111784 (83297,<br>135255) | 121875 (85099,<br>159402) |       |
| Quartile coefficient of dispersion          | 0.24                      | 0.3                       |       |
| <b>P02042 (Hemoglobin subunit delta)</b>    |                           |                           | 0.753 |
| Min-Max                                     | 23278 -<br>10436111       | 23761 - 398739            |       |
| Mean                                        | 448230                    | 137749                    |       |
| Median (Q1,Q3)                              | 76628 (34310,<br>161382)  | 84618 (53065,<br>222472)  |       |
| Quartile coefficient of dispersion          | 0.65                      | 0.61                      |       |
| <b>P30043 (Flavin reductase (NADPH))</b>    |                           |                           | 0.753 |
| Min-Max                                     | 10270 -<br>1273221        | 17374 - 219201            |       |
| Mean                                        | 82113                     | 59590                     |       |

|                                                                         |                                |                                |       |
|-------------------------------------------------------------------------|--------------------------------|--------------------------------|-------|
| Median (Q1,Q3)                                                          | 38050 (27725,<br>56089)        | 34326 (25482,<br>63507)        |       |
| Quartile coefficient of dispersion                                      | 0.34                           | 0.43                           |       |
| <b>Q9Y5Y7 (Lymphatic vessel endothelial hyaluronic acid receptor 1)</b> |                                |                                | 0.753 |
| Min-Max                                                                 | 8735 - 28054                   | 6794 - 35107                   |       |
| Mean                                                                    | 16219                          | 16542                          |       |
| Median (Q1,Q3)                                                          | 14791 (10919,<br>18995)        | 13350 (9755,<br>22276)         |       |
| Quartile coefficient of dispersion                                      | 0.27                           | 0.39                           |       |
| <b>P00734 (Prothrombin)</b>                                             |                                |                                | 0.777 |
| Min-Max                                                                 | 396342 -<br>1660623            | 668348 -<br>1835673            |       |
| Mean                                                                    | 928970                         | 988007                         |       |
| Median (Q1,Q3)                                                          | 903629<br>(752977,<br>1022297) | 949764<br>(740362,<br>1073406) |       |
| Quartile coefficient of dispersion                                      | 0.15                           | 0.18                           |       |
| <b>P02760 (Protein AMBP)</b>                                            |                                |                                | 0.777 |
| Min-Max                                                                 | 61778 - 626727                 | 84436 - 727914                 |       |
| Mean                                                                    | 284815                         | 314674                         |       |
| Median (Q1,Q3)                                                          | 223780<br>(119321,<br>454357)  | 290735<br>(203702,<br>369897)  |       |
| Quartile coefficient of dispersion                                      | 0.58                           | 0.29                           |       |
| <b>P05154 (Plasma serine protease inhibitor)</b>                        |                                |                                | 0.777 |
| Min-Max                                                                 | 62853 - 274752                 | 74586 - 200879                 |       |
| Mean                                                                    | 115325                         | 117695                         |       |
| Median (Q1,Q3)                                                          | 106489 (86753,<br>130261)      | 110113 (96068,<br>124228)      |       |
| Quartile coefficient of dispersion                                      | 0.2                            | 0.13                           |       |

|                                                          |                           |                           |       |
|----------------------------------------------------------|---------------------------|---------------------------|-------|
| <b>P22352 (Glutathione peroxidase 3)</b>                 |                           |                           | 0.777 |
| Min-Max                                                  | 49394 - 447170            | 76987 - 352490            |       |
| Mean                                                     | 127780                    | 133073                    |       |
| Median (Q1,Q3)                                           | 114402 (90594,<br>134393) | 104954 (89583,<br>120105) |       |
| Quartile coefficient of dispersion                       | 0.19                      | 0.15                      |       |
| <b>P00746 (Complement factor D)</b>                      |                           |                           | 0.777 |
| Min-Max                                                  | 4302 - 56386              | 8413 - 72536              |       |
| Mean                                                     | 31209                     | 34952                     |       |
| Median (Q1,Q3)                                           | 31612 (19900,<br>41575)   | 29909 (27319,<br>38850)   |       |
| Quartile coefficient of dispersion                       | 0.35                      | 0.17                      |       |
| <b>P01714 (Immunoglobulin lambda variable 3-19)</b>      |                           |                           | 0.777 |
| Min-Max                                                  | 18228 - 253280            | 14727 - 500977            |       |
| Mean                                                     | 97443                     | 124783                    |       |
| Median (Q1,Q3)                                           | 91907 (55001,<br>128059)  | 86643 (59645,<br>107553)  |       |
| Quartile coefficient of dispersion                       | 0.4                       | 0.29                      |       |
| <b>B9A064 (Immunoglobulin lambda-like polypeptide 5)</b> |                           |                           | 0.801 |
| Min-Max                                                  | 38557 - 166014            | 54533 - 162337            |       |
| Mean                                                     | 95351                     | 95870                     |       |
| Median (Q1,Q3)                                           | 90160 (65563,<br>124358)  | 80105 (71353,<br>130290)  |       |
| Quartile coefficient of dispersion                       | 0.31                      | 0.29                      |       |
| <b>P69905 (Hemoglobin subunit alpha)</b>                 |                           |                           | 0.801 |
| Min-Max                                                  | 868136 -<br>50482776      | 1214276 -<br>12813464     |       |
| Mean                                                     | 6562716                   | 5650107                   |       |

|                                                    |                                  |                                  |       |
|----------------------------------------------------|----------------------------------|----------------------------------|-------|
| Median (Q1,Q3)                                     | 4193688<br>(2774389,<br>7550733) | 4271130<br>(4074870,<br>7579690) |       |
| Quartile coefficient of dispersion                 | 0.46                             | 0.3                              |       |
| <b>P02753 (Retinol-binding protein 4)</b>          |                                  |                                  | 0.801 |
| Min-Max                                            | 176654 -<br>968292               | 370054 -<br>1553806              |       |
| Mean                                               | 595266                           | 627154                           |       |
| Median (Q1,Q3)                                     | 582634<br>(399298,<br>777399)    | 527065<br>(418721,<br>643313)    |       |
| Quartile coefficient of dispersion                 | 0.32                             | 0.21                             |       |
| <b>P04433 (Immunoglobulin kappa variable 3-11)</b> |                                  |                                  | 0.801 |
| Min-Max                                            | 39811 -<br>1749424               | 31505 -<br>1309506               |       |
| Mean                                               | 506378                           | 544457                           |       |
| Median (Q1,Q3)                                     | 351603<br>(291033,<br>648879)    | 478676<br>(176585,<br>749585)    |       |
| Quartile coefficient of dispersion                 | 0.38                             | 0.62                             |       |
| <b>P01591 (Immunoglobulin J chain)</b>             |                                  |                                  | 0.825 |
| Min-Max                                            | 70304 - 475081                   | 129300 -<br>737689               |       |
| Mean                                               | 252858                           | 305383                           |       |
| Median (Q1,Q3)                                     | 222495<br>(187591,<br>336359)    | 309285<br>(167870,<br>336492)    |       |
| Quartile coefficient of dispersion                 | 0.28                             | 0.33                             |       |
| <b>P04004 (Vitronectin)</b>                        |                                  |                                  | 0.850 |
| Min-Max                                            | 732255 -<br>4014260              | 1989228 -<br>4547688             |       |
| Mean                                               | 2532227                          | 2672483                          |       |

|                                                           |                                  |                                  |       |
|-----------------------------------------------------------|----------------------------------|----------------------------------|-------|
| Median (Q1,Q3)                                            | 2519122<br>(2165203,<br>3116609) | 2373868<br>(2074791,<br>3090188) |       |
| Quartile coefficient of dispersion                        | 0.18                             | 0.2                              |       |
| <b>P07996 (Thrombospondin-1)</b>                          |                                  |                                  | 0.850 |
| Min-Max                                                   | 31761 - 226887                   | 42492 - 687359                   |       |
| Mean                                                      | 81288                            | 128844                           |       |
| Median (Q1,Q3)                                            | 60815 (45783,<br>103738)         | 58771 (51860,<br>70020)          |       |
| Quartile coefficient of dispersion                        | 0.39                             | 0.15                             |       |
| <b>P35908 (Keratin, type II cytoskeletal 2 epidermal)</b> |                                  |                                  | 0.850 |
| Min-Max                                                   | 26993 - 246505                   | 29124 - 219308                   |       |
| Mean                                                      | 80894                            | 89136                            |       |
| Median (Q1,Q3)                                            | 66049 (50214,<br>93056)          | 61613 (45458,<br>128155)         |       |
| Quartile coefficient of dispersion                        | 0.3                              | 0.48                             |       |
| <b>P23142 (Fibulin-1)</b>                                 |                                  |                                  | 0.850 |
| Min-Max                                                   | 17059 - 260486                   | 25357 - 84356                    |       |
| Mean                                                      | 57490                            | 53191                            |       |
| Median (Q1,Q3)                                            | 49300 (38185,<br>62412)          | 51782 (35651,<br>62148)          |       |
| Quartile coefficient of dispersion                        | 0.24                             | 0.27                             |       |
| <b>Q96IY4 (Carboxypeptidase B2)</b>                       |                                  |                                  | 0.850 |
| Min-Max                                                   | 30638 - 218775                   | 37628 - 194563                   |       |
| Mean                                                      | 56912                            | 65979                            |       |
| Median (Q1,Q3)                                            | 53132 (43192,<br>57187)          | 48791 (45112,<br>60427)          |       |
| Quartile coefficient of dispersion                        | 0.14                             | 0.15                             |       |
| <b>P00918 (Carbonic anhydrase 2)</b>                      |                                  |                                  | 0.850 |

|                                                        |                         |                         |       |
|--------------------------------------------------------|-------------------------|-------------------------|-------|
| Min-Max                                                | 32832 - 1153001         | 37516 - 404354          |       |
| Mean                                                   | 104343                  | 97682                   |       |
| Median (Q1,Q3)                                         | 61155 (49758, 75301)    | 59446 (43741, 84608)    |       |
| Quartile coefficient of dispersion                     | 0.2                     | 0.32                    |       |
| <b>P07360 (Complement component C8 gamma chain)</b>    |                         |                         | 0.850 |
| Min-Max                                                | 63446 - 186566          | 82044 - 441089          |       |
| Mean                                                   | 112665                  | 145205                  |       |
| Median (Q1,Q3)                                         | 105030 (94693, 135506)  | 106724 (90203, 136534)  |       |
| Quartile coefficient of dispersion                     | 0.18                    | 0.2                     |       |
| <b>P01860 (Immunoglobulin heavy constant gamma 3)</b>  |                         |                         | 0.850 |
| Min-Max                                                | 30469 - 2668165         | 108534 - 1409029        |       |
| Mean                                                   | 615205                  | 486433                  |       |
| Median (Q1,Q3)                                         | 436266 (138056, 872351) | 394641 (208774, 615142) |       |
| Quartile coefficient of dispersion                     | 0.73                    | 0.49                    |       |
| <b>A0A0A0MS15 (Immunoglobulin heavy variable 3-49)</b> |                         |                         | 0.850 |
| Min-Max                                                | 61855 - 537830          | 173413 - 491203         |       |
| Mean                                                   | 252660                  | 253586                  |       |
| Median (Q1,Q3)                                         | 224874 (171901, 299817) | 233345 (176919, 268137) |       |
| Quartile coefficient of dispersion                     | 0.27                    | 0.2                     |       |
| <b>P01764 (Immunoglobulin heavy variable 3-23)</b>     |                         |                         | 0.850 |
| Min-Max                                                | 13140 - 515754          | 34153 - 609350          |       |

|                                                              |                                  |                                  |       |
|--------------------------------------------------------------|----------------------------------|----------------------------------|-------|
| Mean                                                         | 171251                           | 174754                           |       |
| Median (Q1,Q3)                                               | 171353 (38379,<br>221712)        | 119000 (43533,<br>162329)        |       |
| Quartile coefficient of dispersion                           | 0.7                              | 0.58                             |       |
| <b>P19823 (Inter-alpha-trypsin inhibitor heavy chain H2)</b> |                                  |                                  | 0.875 |
| Min-Max                                                      | 561680 -<br>3140585              | 1127813 -<br>1974590             |       |
| Mean                                                         | 1619183                          | 1619636                          |       |
| Median (Q1,Q3)                                               | 1633633<br>(1383034,<br>1818187) | 1717461<br>(1369483,<br>1920851) |       |
| Quartile coefficient of dispersion                           | 0.14                             | 0.17                             |       |
| <b>P02656 (Apolipoprotein C-III)</b>                         |                                  |                                  | 0.875 |
| Min-Max                                                      | 618186 -<br>6155578              | 1113354 -<br>4012052             |       |
| Mean                                                         | 2756885                          | 2765953                          |       |
| Median (Q1,Q3)                                               | 2601740<br>(2064648,<br>3567330) | 3298675<br>(2246997,<br>3544985) |       |
| Quartile coefficient of dispersion                           | 0.27                             | 0.22                             |       |
| <b>Q16610 (Extracellular matrix protein 1)</b>               |                                  |                                  | 0.875 |
| Min-Max                                                      | 30717 - 244097                   | 39114 - 348549                   |       |
| Mean                                                         | 75194                            | 98958                            |       |
| Median (Q1,Q3)                                               | 68012 (51023,<br>84138)          | 68293 (50103,<br>94285)          |       |
| Quartile coefficient of dispersion                           | 0.25                             | 0.31                             |       |
| <b>P00748 (Coagulation factor XII)</b>                       |                                  |                                  | 0.875 |
| Min-Max                                                      | 60604 - 328916                   | 122857 -<br>497249               |       |
| Mean                                                         | 172230                           | 194083                           |       |

|                                                         |                                 |                                 |       |
|---------------------------------------------------------|---------------------------------|---------------------------------|-------|
| Median (Q1,Q3)                                          | 170256<br>(143669,<br>191070)   | 153374<br>(134980,<br>192411)   |       |
| Quartile coefficient of dispersion                      | 0.14                            | 0.18                            |       |
| <b>A0A0B4J2H0 (Immunoglobulin heavy variable 1-69D)</b> |                                 |                                 | 0.875 |
| Min-Max                                                 | 33030 - 474154                  | 52030 - 563916                  |       |
| Mean                                                    | 86732                           | 124937                          |       |
| Median (Q1,Q3)                                          | 67393 (58251,<br>93247)         | 77225 (60282,<br>86316)         |       |
| Quartile coefficient of dispersion                      | 0.23                            | 0.18                            |       |
| <b>P55058 (Phospholipid transfer protein)</b>           |                                 |                                 | 0.875 |
| Min-Max                                                 | 7232 - 122028                   | 6817 - 115840                   |       |
| Mean                                                    | 20572                           | 25279                           |       |
| Median (Q1,Q3)                                          | 14096 (12038,<br>20300)         | 14304 (11731,<br>18624)         |       |
| Quartile coefficient of dispersion                      | 0.26                            | 0.23                            |       |
| <b>P02654 (Apolipoprotein C-I)</b>                      |                                 |                                 | 0.900 |
| Min-Max                                                 | 394398 -<br>2166309             | 340976 -<br>2683947             |       |
| Mean                                                    | 1121837                         | 1190162                         |       |
| Median (Q1,Q3)                                          | 1099236<br>(699419,<br>1507592) | 1125341<br>(859666,<br>1244324) |       |
| Quartile coefficient of dispersion                      | 0.37                            | 0.18                            |       |
| <b>Q96KN2 (Beta-Ala-His dipeptidase)</b>                |                                 |                                 | 0.900 |
| Min-Max                                                 | 8248 - 96818                    | 12320 - 62291                   |       |
| Mean                                                    | 25614                           | 25544                           |       |
| Median (Q1,Q3)                                          | 21070 (14301,<br>29279)         | 21446 (17433,<br>28526)         |       |
| Quartile coefficient of dispersion                      | 0.34                            | 0.24                            |       |



|                                                       |                              |                               |       |
|-------------------------------------------------------|------------------------------|-------------------------------|-------|
| <b>P02766 (Transthyretin)</b>                         |                              |                               | 0.925 |
| Min-Max                                               | 318673 - 4267647             | 647967 - 2539277              |       |
| Mean                                                  | 1539814                      | 1419254                       |       |
| Median (Q1,Q3)                                        | 1272113<br>(753616, 1986297) | 1298911<br>(1005514, 1601701) |       |
| Quartile coefficient of dispersion                    | 0.45                         | 0.23                          |       |
| <b>P06331 (Immunoglobulin heavy variable 4-34)</b>    |                              |                               | 0.925 |
| Min-Max                                               | 11013 - 280243               | 10690 - 262154                |       |
| Mean                                                  | 84533                        | 90893                         |       |
| Median (Q1,Q3)                                        | 68550 (38998, 103029)        | 77092 (36759, 98524)          |       |
| Quartile coefficient of dispersion                    | 0.45                         | 0.46                          |       |
| <b>P0DJ19 (Serum amyloid A-2 protein)</b>             |                              |                               | 0.925 |
| Min-Max                                               | 11198 - 563242               | 19577 - 77743                 |       |
| Mean                                                  | 73145                        | 40478                         |       |
| Median (Q1,Q3)                                        | 31374 (22458, 83807)         | 37347 (24049, 48593)          |       |
| Quartile coefficient of dispersion                    | 0.58                         | 0.34                          |       |
| <b>P07477 (Trypsin-1)</b>                             |                              |                               | 0.925 |
| Min-Max                                               | 9378 - 273432                | 21554 - 138544                |       |
| Mean                                                  | 57277                        | 44014                         |       |
| Median (Q1,Q3)                                        | 31782 (25020, 53000)         | 30264 (25528, 44023)          |       |
| Quartile coefficient of dispersion                    | 0.36                         | 0.27                          |       |
| <b>P01861 (Immunoglobulin heavy constant gamma 4)</b> |                              |                               | 0.950 |
| Min-Max                                               | 13235 - 681793               | 13492 - 182712                |       |
| Mean                                                  | 156994                       | 103201                        |       |

|                                                       |                            |                            |       |
|-------------------------------------------------------|----------------------------|----------------------------|-------|
| Median (Q1,Q3)                                        | 100923 (46842, 167279)     | 106589 (63385, 137862)     |       |
| Quartile coefficient of dispersion                    | 0.56                       | 0.37                       |       |
| <b>P13796 (Plastin-2)</b>                             |                            |                            | 0.950 |
| Min-Max                                               | 18236 - 252191             | 48977 - 155515             |       |
| Mean                                                  | 99399                      | 95269                      |       |
| Median (Q1,Q3)                                        | 104039 (31122, 132905)     | 102750 (60855, 114914)     |       |
| Quartile coefficient of dispersion                    | 0.62                       | 0.31                       |       |
| <b>P02747 (Complement C1q subcomponent subunit C)</b> |                            |                            | 0.950 |
| Min-Max                                               | 140280 - 828841            | 351194 - 746599            |       |
| Mean                                                  | 551755                     | 555043                     |       |
| Median (Q1,Q3)                                        | 541258 (506186, 629067)    | 583980 (510514, 598619)    |       |
| Quartile coefficient of dispersion                    | 0.11                       | 0.08                       |       |
| <b>P01876 (Immunoglobulin heavy constant alpha 1)</b> |                            |                            | 0.999 |
| Min-Max                                               | 37173 - 17707384           | 5316074 - 14032357         |       |
| Mean                                                  | 7726159                    | 8141267                    |       |
| Median (Q1,Q3)                                        | 7352056 (6125429, 9641325) | 6951089 (5668007, 9718803) |       |
| Quartile coefficient of dispersion                    | 0.22                       | 0.26                       |       |
| <b>A0A0C4DH72 (Immunoglobulin kappa variable 1-6)</b> |                            |                            | 0.999 |
| Min-Max                                               | 288827 - 2537372           | 451928 - 1141652           |       |
| Mean                                                  | 749277                     | 703085                     |       |
| Median (Q1,Q3)                                        | 659071 (537379, 818344)    | 684106 (632299, 777604)    |       |

|                                    |      |     |  |
|------------------------------------|------|-----|--|
| Quartile coefficient of dispersion | 0.21 | 0.1 |  |
|------------------------------------|------|-----|--|

Q1 – the first quartile; Q3 – the third quartile; Mann-Whitney U test was applied for comparison of the quantitative data; p-value equal or less than 0.05 was considered statistically significant.
